# Supplementary material for: Population Growth–Land Use/Land Cover Transformations–Water Quality Nexus in Upper Ganga River Basin
Source: Copernicus journal article supplement (doi:10.5194/hess-2017-384), 2017-10-20
Supplement: Supplementary file [file hess-2017-384-RC3-supplement.pdf]

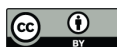

# 1 **Population Growth – Land Use/Land Cover Transformations-Water Quality** 2 **Nexus in Upper Ganga River Basin**

3 Anoop Kumar Shukla<sup>1</sup>, Chandra Shekhar Prasad Ojha<sup>1</sup>, Ana Mijic<sup>2</sup>, Wouter Buytaert<sup>2</sup>, Shray Pathak<sup>1</sup>, Rahul Dev  
4 Garg<sup>1</sup> and Satyavati Shukla<sup>3</sup>

5 <sup>1</sup>Department of Civil Engineering, Indian Institute of Technology Roorkee, Uttarakhand, India

6 <sup>2</sup>Department of Civil and Environmental Engineering, Imperial College London, London, UK

7 <sup>3</sup>Centre of Studies in Resources Engineering (CSRE), Indian Institute of Technology Bombay, Mumbai, India

8 E-mail- [anoopgeomatics@gmail.com](mailto:anoopgeomatics@gmail.com), [cspojha@gmail.com](mailto:cspojha@gmail.com), [ana.mijic@imperial.ac.uk](mailto:ana.mijic@imperial.ac.uk), [w.buytaert@imperial.ac.uk](mailto:w.buytaert@imperial.ac.uk),  
9 [shraypathak@gmail.com](mailto:shraypathak@gmail.com), [rdgarg@gmail.com](mailto:rdgarg@gmail.com), [satyashukla@iitb.ac.in](mailto:satyashukla@iitb.ac.in)

## 10 **Abstract**

11 For sustainable development in a river basin it is crucial to understand population growth-Land  
12 Use/Land Cover (LULC) transformations-water quality nexus. This study investigates effects of  
13 demographic changes and LULC transformations on surface water quality of Upper Ganga River  
14 basin. River gets polluted in both rural and urban area. In rural area, pollution is because of  
15 agricultural practices mainly fertilizers, whereas in urban area it is mainly because of domestic  
16 and industrial wastes. First, population data was analyzed statistically to study demographic  
17 changes in the river basin. LULC change detection was done over the period of February/March  
18 2001 to 2012 [Landsat 7 Enhanced Thematic Mapper (ETM+) data] using remote sensing and  
19 Geographical Information System (GIS) techniques. Further, water quality parameters viz.  
20 Biological Oxygen Demand (BOD), Dissolve Oxygen (DO) %, Flouride (F), Hardness CaCO<sub>3</sub>,  
21 pH, Total Coliform bacteria and Turbidity were studied in basin for pre-monsoon (May),  
22 monsoon (July) and Post-monsoon (November) seasons. Non-parametric Mann-Kendall rank test  
23 was done on monthly water quality data to study existing trends. Further, Overall Index of  
24 Pollution (OIP) developed specifically for Upper Ganga River basin was used for spatio-



25 temporal water quality assessment. From the results, it was observed that population has  
26 increased in the river basin. Therefore, significant and characteristic LULC changes are observed  
27 in the study area. Water quality degradation has occurred in the river basin consequently the  
28 health status of the rivers have also changed from range of acceptable to slightly polluted in  
29 urban areas.

30 **Keywords:** Land use/land cover, Overall Index of Pollution, Remote sensing, River basin.

### 31 **1. Introduction**

32 Demographic changes and anthropogenic activities are potential drivers affecting the quantity  
33 and quality of available water resources on local, regional and global scale. These drivers pose a  
34 threat to the quantity and quality of water resources directly by increased anthropogenic water  
35 demands and water pollution. Indirectly, the water resources are affected by LULC changes and  
36 associated changes in water use patterns (Yu et al. 2016). Rapid increase in population and  
37 economic hardship is causing urbanization (Bjorklund et al. 2011). These **affects** cause changes  
38 in natural landscape characteristics and river morphometry; and increase in pollutant loads.  
39 Hence, LULC and water quality indicator parameters are often used in water quality assessment  
40 studies (Kocer and Sevgili 2014; Liu et al. 2016; Sanchez et al. 2007; Tu 2011). River has a  
41 capability to reduce its pollutant load, also known as self-purification (Hoseinzadeh et al. 2014).  
42 In extreme situations, ecosystem degradation caused by anthropogenic factors can be an  
43 irreversible change. Hence, it is crucial to understand effects of demographic changes and LULC  
44 transformations on water quality for pollution control and sustainable water resources  
45 development in a river basin (Milovanovic 2007; Teodosiu et al. 2013). Anthropogenic activities  
46 in a river basin are directly correlated with the decline in water quality (Haldar et al. 2014). In  
47 order to increase yield, farmers introduce chemicals in the form of fertilizers, pesticides,



48 herbicides, etc., causing addition of pollutants in the river (Rashid and Romshoo 2013; Yang et  
49 al. 2013). Urban areas introduce pollutants from leachates of landfill sites, stormwater runoff and  
50 from direct dumping of waste (Tsihrintzis and Hamid 1997). Water quality impairment causes  
51 change in the various physico-chemical and bacteriological characteristics of the river water, viz.  
52 Biological Oxygen Demand (BOD), temperature, pH, Chloride (Cl), Colour, Dissolved Oxygen  
53 (DO), Hardness CaCO<sub>3</sub>, Turbidity, Total Dissolved Solids (TDS), etc. These changes make the  
54 river water unfit for human health (Ballestar et al. 2003; Chalmers et al. 2007; Smith et al. 1999).  
55 Ban et al. (2014) observed that water quality monitoring programs monitor and produce large  
56 and complex datasets on parameters related to physico-chemical and bacteriological properties of  
57 the river water. Trends in the water quality vary both spatially and temporally, causing difficulty  
58 in establishing relationship between water quality and LULC changes (Phung et al. 2015; Russell  
59 2015). Broadly, there are two methods to study the spatio-temporal variations in the water  
60 quality of a river: (i) Direct method where spatio-temporal variability in the water quality  
61 parameters are studied with the help of statistical analysis and graphs, and (ii) Indirect methods  
62 where different water quality/pollution indices based on environmental standards of surface  
63 water are used (Rai et al. 2011). Demographic growth, LULC changes and their effects on water  
64 quality of a region are very site specific. Hence, different regions/countries have developed their  
65 own water quality or pollution indices for different types of water uses based on their respective  
66 water quality standards/permissible pollution limits (Rangeti et al. 2015). Water quality index  
67 (WQI) is a single numerical value that reflects the health of a waterbody by giving combined  
68 effects of various water quality parameters. WQI is a simplest and fastest indicator to assess  
69 water quality of a river (Hoseinzadeh et al. 2014). Formulation of water quality indices are done  
70 in two ways: (i) in the first way there is increase in index numbers with the degree of pollution.



71 It can be classified as ‘water pollution indices’ and (ii) in the second way there is decrease in the  
72 index numbers with degree of pollution. Hence, later can be classified as ‘water-quality indices’.  
73 The difference between the two is just superficial. ‘Water pollution’ which indicates ‘degraded  
74 water quality’ of a waterbody is mere a special case of the general term ‘water quality’ (Abbasi  
75 and Abbasi 2012).

76 Several site specific water quality/pollution indices available in the literature are: Composite  
77 Water Quality Identification Index (CWQII) (Ban et al. 2014); River Pollution Index (RPI),  
78 Forestry Water Quality Index (FWQI) and National Sanitation Foundation Water Quality Index  
79 (NSFWQI) (Hoseinzadeh et al. 2014); Canadian Water Quality Index (CWQI) (Farzadkia et al.  
80 2015); Comprehensive water pollution index of China (Li et al. 2015); Prati’s implicit index of  
81 pollution (Prati et al. 1971); **Horton’s index, Nemerow and Sumitomo Pollution Index,**  
82 **Bhargava’s index, Dinius second index, Smith’s index, Aquatic toxicity index, Chesapeake Bay**  
83 **water quality indices, Modified Oregon WQI, Li’s regional water resource quality assessment**  
84 **index, Stoner’s index, Two-tier WQI, Canadian WQI by Canadian Council of Ministers of the**  
85 **Environment (CCME), Universal WQI, Overall index of pollution (OIP), Coastal WQI for**  
86 **Taiwan, etc.** (Abbasi and Abbasi 2012; Rai et al. 2011).

87 Water Quality Indices are often used to investigate the spatio-temporal variations in water  
88 quality of a river. Water quality indices study the combined effects of variations in water quality  
89 parameters on river health and to compare it along the river basin to estimate the permissible  
90 limits and their changing trends (Abbasi and Abbasi 2012). Remote sensing and GIS are efficient  
91 aids in preparing and analyzing spatial datasets such as satellite data, Digital Elevation Model  
92 (DEM) data, etc. Remote sensing technology is often used in preparing LULC maps of a region  
93 whereas GIS helps in delineation of river basin boundaries, extraction of study area, hydrological

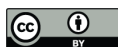

94 modeling, etc. (Kindu et al. 2015; Kumar and Jhariya 2015; Wilson 2015). Selection of  
95 appropriate method for a particular study is based on the specific objectives and availability of  
96 the data/tools required for the study. In this particular study, a WQI called ‘Overall Index of  
97 Pollution’ (OIP) developed specifically for Indian conditions by Sargoankar and Deshpande  
98 (2003) is used to assess the health status of surface waters across Ganga River basin. Thus,  
99 present study focuses on identifying the drivers associated with spatio-temporal variation of  
100 water quality in Upper Ganga River basin by considering the demographic changes and LULC  
101 changes. In this, seasonal studies are assessed at different monitoring stations and also the study  
102 aims to check the effectiveness of OIP method.

## 103 2. Study area

104 The Upper **Ganges** basin (UGB) is experiencing rapid rate of change in land cover and irrigation  
105 practices. A part of the Upper Ganga River basin is selected as the study area (Fig. 1). It is  
106 located in the parts of Uttarakhand, Uttar Pradesh, Bihar and Himanchal Pradesh states of India  
107 and covers total drainage area of 238347.74 km<sup>2</sup>. The geographical extent of the river basin is  
108 between 24<sup>0</sup> 32' 16"–31<sup>0</sup> 57' 48" N to 76<sup>0</sup> 53' 33"–85<sup>0</sup> 18' 25" E. The altitude ranges from 7500  
109 m in the Himalayan region to 100 m in the lower Gangetic plains. Some mountain peaks in the  
110 headwater reaches are permanently covered with snow. Annual average rainfall in the UGB is in  
111 the range of 550-2500 mm (Bharati and Jayakody 2010). Major rivers contributing this river  
112 basin are Bhagirathi, Alaknanda, Yamuna, Dhauliganga, Pindar, Mandakini, Nandakini,  
113 Ramganga, Tamsa (Tons), etc. Tehri Dam constructed on Bhagirathi River is an important  
114 hydropower project. This region comprises of major cities and towns such as Allahabad, Kanpur,  
115 Varanasi, Dehradun, Rishikesh, Haridwar, Moradabad, Bareilly Bijnor, Garhmukteshwar,  
116 Narora, Farrukhabad, Badaun, Chandausi, Amroha, Kannauj, Unnao, Fatehpur, Mirzapur, etc.



117 Most predominant soil groups found in the region are alluvial, sand, loam, clay and their  
118 combinations. Due to favorable agricultural conditions majority of the population practices  
119 agriculture and horticulture. However, a large portion of the total population lives in cities  
120 located mainly along Ganga River. Most of them work in urban or industrial areas.

121

122

123

124

125

126

127

128

129

130

131

132

133

134

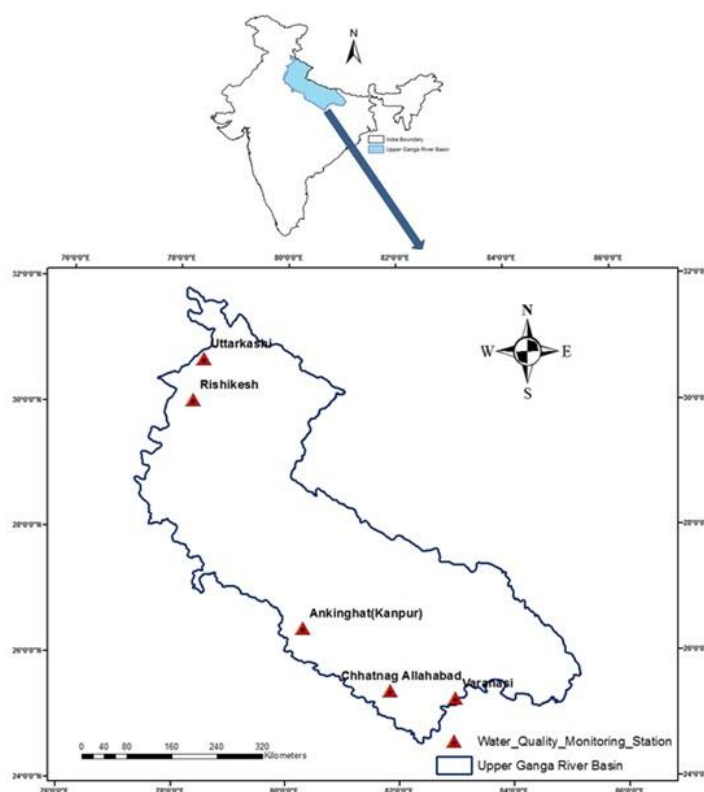

135 **Figure 1.** Location map of the study area in northern India and water quality monitoring stations

136 across Upper Ganga River basin

### 137 3. Data description

#### 138 3.1 Data acquired



139 In this study, two types of datasets were used: (i) Spatial datasets: (a) Shuttle Radar Topography  
140 Mission (SRTM) 1 arc-second global Digital Elevation Model (DEM) of 30 m spatial resolution;  
141 and (b) Landsat 7 Enhanced Thematic Mapper Plus (ETM+) images, 23 in total, for the month of  
142 February/March in 2001 and 2012, having 30 m spatial resolution. Both SRTM DEM and time  
143 series Landsat dataset were collected from United States Geological Survey (USGS), United  
144 States of America (USA) (USGS 2016); (c) Survey of India toposheets of 1:50,000 scale from  
145 Survey of India (SoI), Government of India (GoI); (d) Published LULC, waterbodies, urban  
146 landuse and wasteland maps from Bhuvan Portal, Indian Space Research Organization (ISRO),  
147 Government of India (Bhuvan 2016). SoI toposheets and published maps were used as reference  
148 to improve the LULC classification results; and (e) For ground truthing of prepared LULC maps,  
149 Ground Control Points (GCPs) collected using Global Positioning System (GPS) during the field  
150 visit and Google Earth were used.

151 (ii) Non-spatial datasets were acquired from various departments of Government of India: (a)  
152 Census records and reports of the years 2001 and 2011 from Census of India (Census of India  
153 2011); (b) Reports on LULC statistics from Bhuvan Portal, ISRO, GoI; (c) Monthly water  
154 quality datasets of the year 2001-2012 from Central Water Commission (CWC); and (d) Water  
155 quality reports from Central Pollution Control Board (CPCB), Uttar Pradesh Pollution Control  
156 Board (UPPCB), CWC and National Remote Sensing Centre (NRSC), ISRO, GoI.

### 157 **3.2 Field data and water quality monitoring stations**

158 The total of 649 validation points for LULC map of 2012 were selected by visual interpretation  
159 of high-resolution imagery on Google Earth and verified with ground truth data collected after a  
160 survey of the site in 2012. **In addition**, GPS survey was carried out and samples of LULC were  
161 collected in the Upper Ganga River basin. These ground truth GPS data were used to relate land



162 cover to the supervised classifications results. To understand the impacts of LULC  
163 transformations on water quality of the Upper Ganga River basin, two water quality monitoring  
164 stations viz. Uttarkashi and Rishikesh were chosen in the upper reach of the river basin. This part  
165 of the river basin comprises of hilly undulating terrain with moderately less anthropogenic  
166 influences. Moreover, three water quality monitoring stations viz. Kanpur (Ankinghat),  
167 Allahabad (Chhatnag), and Varanasi were selected in the lower reach of the river basin. This part  
168 of the river basin falls under Gangetic plains with extreme anthropogenic activities. Spatio-  
169 temporal changes in the water quality of these monitoring stations were examined over a period  
170 of year 2001-2012.

#### 171 **4. Methodology**

172 Flow chart of the methodology illustrated in Fig. 2 shows that the study is conducted in three  
173 phases: (i) In the first phase, remote sensing and GIS techniques are used. First SRTM DEM data  
174 is pre-processed by filling the sinks in the dataset using ArcGIS 10.1 Geo-processing tools. After  
175 pre-processing of the SRTM DEM, Arc Hydro tools are used to delineate the Upper Ganga River  
176 basin boundary using geo-processing techniques. Landsat satellite dataset of each year consisted  
177 of 23 images of February/March. The images of same months are used to reduce errors in LULC  
178 change detection due to LULC of different seasons. The satellite images are first geo-registered  
179 and mosaicked. To achieve the consistent radiometric and geometric images for LULC change  
180 analysis, relative geometric correction methods are employed to have good geometric  
181 consistency between the time series satellite images. The geometrically rectified images must  
182 have Root Mean Square Error (RMSE) less than 0.5. This is the criteria often used for geometric  
183 corrections of the satellite images (Samal and Gedam 2015). After extracting the study area,  
184 samples are collected for each LULC class and Maximum Likelihood Classifier (MLC) of





185 supervised classification approach is used to classify the time series satellite images of both 2001  
186 and 2012 years into 6 LULC classes, viz. snow cover, forests, built-up lands, agricultural lands,  
187 water bodies and wastelands. Accuracy assessment is done using GCPs collected from field visit,  
188 SoI topographic maps and Google Earth images. SoI topographic maps and published LULC,  
189 waterbodies, urban landuse and wasteland maps of Bhuvan Portal are used as reference to  
190 improve the LULC classification results. A confusion matrix is generated showing accuracy  
191 statistics of the LULC map. Due to a lack of ground truth data of year 2001, the accuracy  
192 assessment is done for the LULC of the year 2012. Both time series satellite dataset are of  
193 Landsat ETM+ with spatial resolution of 30 m and a large number of GCPs are available for the  
194 year 2012. Hence, LULC map of year 2012 would represent the overall accuracy of both the  
195 maps.

196 Further, post classification change detection method is used for change detection in the study  
197 area; (ii) in the second phase, population data available for year 2001 and 2011 are analyzed  
198 statistically to understand the population growth in the region. Census of India, provides village  
199 wise population data for rural areas and ward/city wise population data for urban areas. The  
200 population data of 77 districts falling into Upper Ganga River basin are organized into rural and  
201 urban populations to study population change patterns in the study area between the years 2001  
202 and 2011; and (iii) in the third phase, first the statistical analysis and non-parametric Mann-  
203 Kendall rank test are performed on seven monthly water quality parameters (BOD, DO%,  
204 Flouride (F), Hardness CaCO<sub>3</sub>, pH, Total Coliform Bacteria and Turbidity) of the five water  
205 quality monitoring stations viz. Uttarkashi, Rishikesh, Kanpur (Ankinghat), Allahabad  
206 (Chhatnag), and Varanasi. Further, a Water Quality Index (WQI) called 'Overall Index of  
207 Pollution' (OIP) developed by Sargoankar and Deshpande (2003) is used to study spatio-



208 temporal variations in the water quality of pre-monsoon, monsoon and post-monsoon seasons of

209 Upper Ganga River basin.

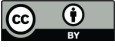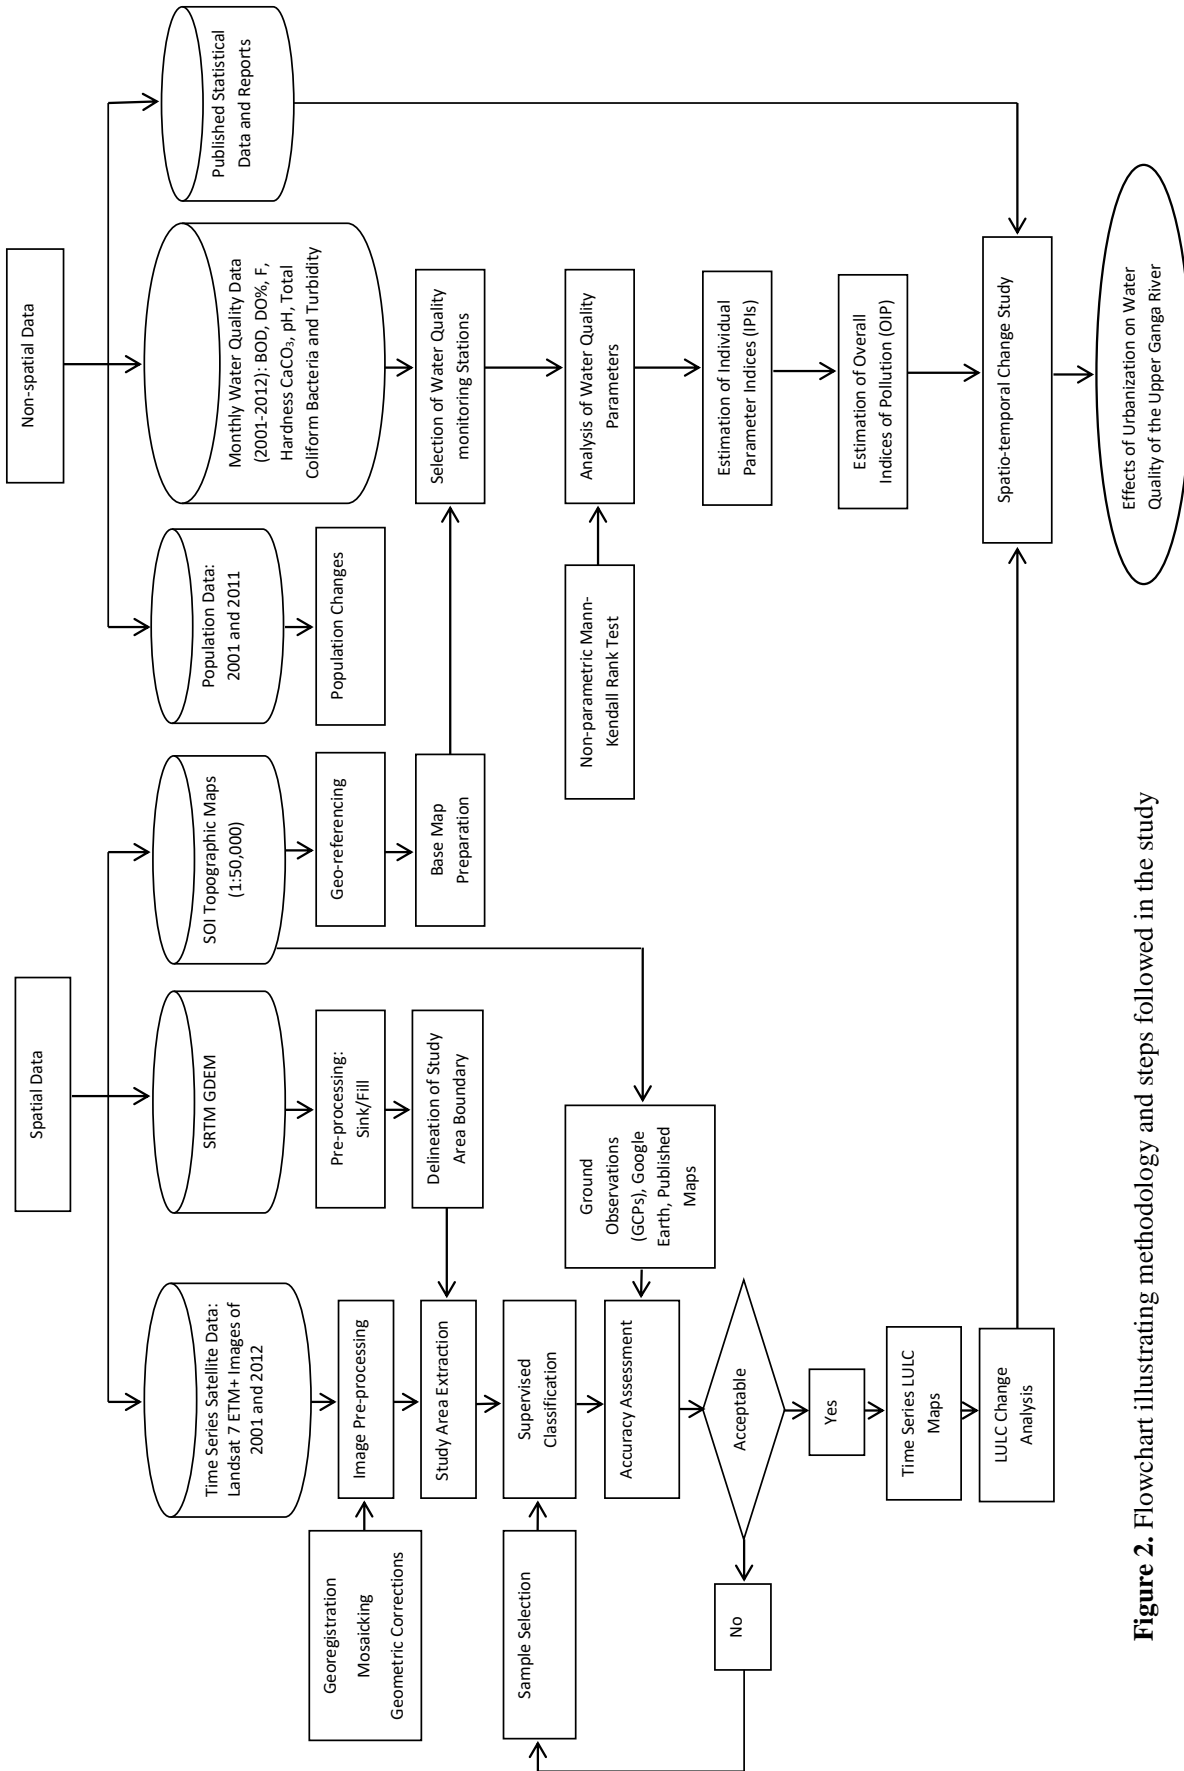

**Figure 2.** Flowchart illustrating methodology and steps followed in the study



#### 1 **4.1 Overall Index of Pollution (OIP)**

2 Overall Index of Pollution (OIP) is a Water Quality Index (WQI) developed by Sargoankar and  
3 Deshpande (2003) which assesses the health status of surface waters, specifically under Indian  
4 conditions. It is a general classification scheme based on the concept similar to Prati et al.  
5 (1971). It takes into consideration the water quality standards/classification scheme of various  
6 national and international agencies, viz. Central Pollution Control Board (CPCB), India; water  
7 quality standards of Indian Standards Institution-10500 (ISI); water quality standards of  
8 European Community (EC) and World Health Organization (WHO), etc. and reported pollution  
9 effects of important water quality indicator parameters. In this scheme, water quality status is  
10 reflected in terms of pollution effects caused by parameters considered under the study. There  
11 are total five classes, viz. C1: Excellent/pristine, C2: Acceptable/requires disinfection, C3:  
12 Slightly polluted/requires filtration and disinfection, C4: Polluted/requires special treatment and  
13 disinfection and C5: Heavily polluted/cannot be used. On the basis of water quality  
14 standards/limits of CPCB, the different concentration level of the parameters are put into these  
15 classes. In order to bring the different water quality parameters into a common unit, an integer  
16 value (also known as class index) 1, 2, 4, 8 and 16 is assigned to each class i.e. C1, C2, C3, C4  
17 and C5 respectively in geometric progression. The class indices indicate the pollution level of  
18 water in numeric terms (Table 2). The concentration value of the parameter is then assigned to  
19 the respective mathematical equation of value function curves to obtain one number value called  
20 an Individual Parameter Index (IPI) or ( $P_i$ ) (Table 3). Finally, the Overall Index of Pollution  
21 (OIP) is calculated as a mean of all the Individual Pollution Indices or ( $P_i$ ) considered in the  
22 study and mathematically it is given by expression:

$$23 \quad \text{Overall Index of Pollution (OIP)} = \frac{\sum_i P_i}{n} \quad (1)$$



24 Where,  $P_i$  is the pollution index for the  $i$ th parameter,  $i=1, 2, \dots, n$  and  $n$  denotes the number of  
 25 parameters. Table 1 presents the water quality parameters across Upper Ganga River basin for  
 26 pre-monsoon, monsoon and post-monsoon seasons over periods of 2001 and 2012.

27 Using mathematical equations given in Table 3, Individual Parameter Indices (IPIs) are  
 28 calculated for each parameter at a given time interval. Finally, OIP is estimated for each water  
 29 quality monitoring station across the Upper Ganga River basin over a period of 2001 to 2012.  
 30 OIP is developed by taking mean of IPIs of all the water quality parameters which is computed  
 31 by mathematical expression Eq. (1). While calculating OIP, the mean of IPIs all the seven  
 32 parameters, viz. BOD, DO %, Flouride (F), Hardness  $\text{CaCO}_3$ , pH, Total Coliform Bacteria and  
 33 Turbidity are used. **It gives the combined effect of all the water quality parameters on the water**  
 34 **quality status of a particular station in a given time.** All the OIP were calculated for each station  
 35 data in the basin for pre-monsoon, monsoon and post-monsoon seasons. Further, spatio-temporal  
 36 variations in the water quality as a result of LULC transformations were studied for study basin  
 37 using OIP.

38 **Table 1.** Water quality parameters across Upper Ganga River basin for pre-monsoon, monsoon  
 39 and post-monsoon seasons over periods of 2001-2012

40 (i)

| Parameters<br>(Year 2001) | Water Quality Monitoring Stations |      |      |           |      |      |        |      |      |           |      |      |          |      |      |
|---------------------------|-----------------------------------|------|------|-----------|------|------|--------|------|------|-----------|------|------|----------|------|------|
|                           | Uttarkashi                        |      |      | Rishikesh |      |      | Kanpur |      |      | Allahabad |      |      | Varanasi |      |      |
|                           | May                               | Jul  | Nov  | May       | Jul  | Nov  | May    | Jul  | Nov  | May       | Jul  | Nov  | May      | Jul  | Nov  |
| BOD                       | 1.1                               | 1.1  | 1.1  | 1.1       | 1.0  | 1.1  | 2.8    | 1.7  | 2.4  | 4.0       | 4.2  | 3.7  | 2.5      | 2.2  | 1.8  |
| DO%                       | 88                                | 104  | 89   | 71        | 60   | 64   | 89     | 96   | 93   | 92        | 84   | 95   | 90       | 92   | 85   |
| F                         | 0.19                              | 0.04 | 0.22 | 0.23      | 0.16 | 0.26 | 0.61   | 0.21 | 0.34 | 0.09      | 0.50 | 0.51 | 0.3      | 0.05 | 0.51 |
| Hardness $\text{CaCO}_3$  | 65                                | 60   | 68   | 76        | 67   | 74   | 99     | 78   | 86   | 95        | 194  | 159  | 99       | 176  | 142  |



|                |     |     |     |     |     |     |     |     |     |      |      |      |      |      |      |
|----------------|-----|-----|-----|-----|-----|-----|-----|-----|-----|------|------|------|------|------|------|
| pH             | 8.1 | 8.1 | 8.1 | 8.1 | 8.1 | 8.1 | 8.0 | 8.3 | 8.1 | 8.2  | 8.3  | 8.2  | 8.2  | 8.4  | 8.2  |
| Total Coliform | -   | -   | -   | -   | -   | -   | -   | -   | -   | 3000 | 6200 | 6500 | 5100 | 5300 | 2400 |
| Turbidity      | -   | -   | -   | -   | -   | -   | 2.0 | 3.1 | 2.3 | 0.1  | 0.2  | 0.1  | 0.1  | 0.1  | 0.1  |

41

42 (ii)

43

| Parameters<br>(Year 2012)  | Water Quality Monitoring Stations |      |      |           |      |      |        |      |      |           |      |      |          |      |      |
|----------------------------|-----------------------------------|------|------|-----------|------|------|--------|------|------|-----------|------|------|----------|------|------|
|                            | Uttarkashi                        |      |      | Rishikesh |      |      | Kanpur |      |      | Allahabad |      |      | Varanasi |      |      |
|                            | Ma                                | Jul  | Nov  | May       | Jul  | Nov  | May    | Jul  | Nov  | May       | Jul  | Nov  | May      | Jul  | Nov  |
| BOD                        | 1.1                               | 1.2  | 1.0  | 1.0       | 1.2  | 1.2  | 7.0    | 10.0 | 4.0  | 2.9       | 3.2  | 2.4  | 3.0      | 3.9  | 2.9  |
| DO%                        | 73                                | 64   | 73   | 81        | 75   | 77   | 86     | 75   | 90   | 85        | 108  | 98   | 101      | 98   | 98   |
| F                          | 0.4                               | 0.26 | 0.44 | 0.09      | 0.19 | 0.06 | 0.70   | 0.80 | 0.51 | 0.51      | 0.67 | 0.56 | 0.57     | 0.54 | 0.52 |
| Hardness CaCO <sub>3</sub> | 45                                | 24   | 34   | 33        | 23   | 56   | 110    | 102  | 90   | 97        | 85   | 92   | 89       | 75   | 81   |
| pH                         | 7.8                               | 7.7  | 7.6  | 7.8       | 8.0  | 7.8  | 8.7    | 8.4  | 8.1  | 8.2       | 8.5  | 8.2  | 8.7      | 8.4  | 8.7  |
| Total Coliform             | -                                 | -    | -    | -         | -    | -    | -      | -    | -    | 5200      | 5800 | 4600 | 5600     | 7300 | 4700 |
| Turbidity                  | -                                 | -    | -    | -         | -    | -    | 4.0    | 6.0  | 5.4  | 0.1       | 0.5  | 0.1  | 0.1      | 0.2  | 0.1  |

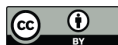

**Table 2.** Classification scheme of water quality (Source: Sargoankar and Deshpande 2003)

| Classification    | Classif<br>Class | Class Index<br>(Score) | Concentration Limit / Ranges of Water Quality Parameters |              |             |                                      |                     |                                |                    |
|-------------------|------------------|------------------------|----------------------------------------------------------|--------------|-------------|--------------------------------------|---------------------|--------------------------------|--------------------|
|                   |                  |                        | BOD<br>(mg/L)                                            | DO<br>(%)    | F<br>(mg/L) | Hardness<br>CaCO <sub>3</sub> (mg/L) | pH<br>(pH unit)     | Total Coliform<br>(MPN/100 mL) | Turbidity<br>(NTU) |
| Excellent         | C <sub>1</sub>   | 1                      | 1.5                                                      | 88-112       | 1.2         | 75                                   | 6.5-7.5             | 50                             | 5                  |
| Acceptable        | C <sub>2</sub>   | 2                      | 3                                                        | 75-125       | 1.5         | 150                                  | 6.0-6.5 and 7.5-8.0 | 500                            | 10                 |
| Slightly Polluted | C <sub>3</sub>   | 4                      | 6                                                        | 50-150       | 2.5         | 300                                  | 5.0-6.0 and 8.0-9.0 | 5000                           | 100                |
| Polluted          | C <sub>4</sub>   | 8                      | 12                                                       | 20-200       | 6.0         | 500                                  | 4.5-5 and 9-9.5     | 10000                          | 250                |
| Heavily Polluted  | C <sub>5</sub>   | 16                     | 24                                                       | <20 and >200 | <6.0        | >500                                 | <4.5 and >9.5       | 15000                          | >250               |



1 **Table 3.** Mathematical expression for value function curves (Source: Sargoankar and Deshpande  
 2 2003)

| S. No. | Parameter                  | Concentration Range | Mathematical Expressions        |
|--------|----------------------------|---------------------|---------------------------------|
| 1.     | BOD                        | <2                  | $x = 1$                         |
|        |                            | 2-30                | $x = y/1.5$                     |
| 2.     | DO%                        | $\leq 50$           | $x = \exp(-(y - 98.33)/36.067)$ |
|        |                            | 50-100              | $x = (y - 107.58)/14.667$       |
|        |                            | $\geq 100$          | $x = (y - 79.543)/19.054$       |
| 3.     | F                          | 0-1.2               | $x = 1$                         |
|        |                            | 1.2-10              | $x = ((y/1.2) - 0.3819)/0.5083$ |
| 4.     | Hardness CaCO <sub>3</sub> | $\leq 75$           | $x = 1$                         |
|        |                            | 75-500              | $x = \exp(y + 42.5)/205.58$     |
|        |                            | >500                | $x = (y + 500)/125$             |
| 5.     | pH                         | 7                   | $x = 1$                         |
|        |                            | >7                  | $x = \exp((y - 7.0)/1.082)$     |
|        |                            | <7                  | $x = \exp((7 - y)/1.082)$       |
| 6.     | Total Coliform             | $\leq 50$           | $x = 1$                         |
|        |                            | 50-5000             | $x = (y/50)**0.3010$            |
|        |                            | 5000-15000          | $x = ((y/50) - 50)/16.071$      |
|        |                            | >15000              | $x = (y/15000) + 16$            |
| 7.     | Turbidity                  | $\leq 10$           | $x = 1$                         |
|        |                            | 10-500              | $x = (y + 43.9)/34.5$           |

3

4 **5. Results and discussion**

5 **5.1 Population dynamics in the Upper Ganga River basin**





6 The first objective of the study was to understand how population has changed in the basin of  
7 Upper Ganga River basin. Time series population data of year 2001-2011 were analyzed for the  
8 basin. A total 77 districts of four different states, viz. Uttar Pradesh, Uttarakhand, Bihar and  
9 Himanchal Pradesh lie in Upper Ganga River basin boundary. Census data provided by Census  
10 of India, GoI, is available village wise for rural areas and ward/city wise for urban areas. It is  
11 used to estimate the urban and rural population of the study area to understand its demographic  
12 patterns. From the results it is observed that total population has increased tremendously over the  
13 past decades from 2001 to 2011 of UG basin. Total population of Upper Ganga River basin is  
14 172,415,564 and 198,762,389 individuals in 2001 and 2011, respectively. Total rural population  
15 of basin is estimated to be 136,819,415 and 153,854,986 persons in 2001 and 2011, respectively  
16 whereas urban population varied from 35,596,149 persons in 2001 to 44,907,403 persons in  
17 2011. Ganga River basin is the most sacred and populated river basins in India which is endowed  
18 with varying topography, climate and mineral rich alluvial soils in the Gangetic Plains area. Due  
19 to high soil fertility in the region, 60% of the population practise agricultural activities. This  
20 accounts for the high rural population in the region. Due to hilly terrain in the northern part of  
21 the basin, the population is less compared to the southern part of the basin. Due to its religious  
22 and economic significance a large number of densely populated cities and towns are located on  
23 the banks of the river mainly in the Gangetic Plain region, e.g. Kanpur, Agra, Meerut, Varanasi,  
24 Allahabad, etc. These cities have large growing populations and a rapidly expanding industrial  
25 sector (NRSC 2014). The percentage change from one period to another (population growth rate)  
26 is calculated for rural and urban population in the study area using Eq. 2 given below:

$$27 \quad PGR = \frac{(P_{\text{present}} - P_{\text{past}})}{P_{\text{past}}} \times 100 \quad (2)$$



28 Where,

29 PGR - Population Growth Rate

30  $P_{present}$  - Present Population

31  $P_{past}$  - Past Population

32 Population growth rate of 15.28% is observed in the total population of complete river basin  
33 from 2001 to 2011. Fig. 3 illustrates the population growth rate in rural and urban population of  
34 Upper Ganga River basin between 2001-2011. It can be observed that the PGR of urban and  
35 rural population is 26.16% and 12.45% respectively. Hence, the PGR in urban areas is much  
36 higher than rural areas between 2001 to 2011. The high growth in the urban population is due to  
37 natural population growth in the various towns across the river basin and due to migration of the  
38 people not only just from villages but from different parts of the country especially to the cities  
39 of Kanpur, Varanasi and Allahabad. The total population of the districts **consisting of** the five  
40 monitoring stations, viz. Uttarkashi, Dehradun (Rishikesh), Kanpur, Allahabad and Varanasi was  
41 295,013, 1,282,143, 5,731,335, 4,936,105, and 3,138,671 people in 2001 which increased to  
42 330,086, 1,696,694, 6,377,452, 5,954,391 and 3,676,841 people in 2011, respectively.  
43 Population density of the Uttarkashi, Dehradun (Rishikesh), Kanpur, Allahabad and Varanasi  
44 districts are 41, 549, 1,024, 1,086 and 2,395 persons per square km respectively. It is be noticed  
45 that population density of Dehradun (Rishikesh), Kanpur, Allahabad and Varanasi districts are  
46 much higher against the average population density of Ganga River basin, i.e. 520 per square  
47 km. Varanasi is the most populated districts in the country. All these districts are located on the  
48 banks of the Ganga River; therefore, a large amount of municipal sewage waste and toxic  
49 industrial effluents are introduced into the river water all along these districts. From various  
50 studies it has been already established that the water of Ganga River near Kanpur, Allahabad and



51 Varanasi cities is highly polluted (Gowd et al. 2010; Rai et al. 2010; Sharma et al. 2014).  
52 Therefore, it is important to understand the demography of these districts in addition to the  
53 population study of the complete river basin as they are directly affecting the water quality of the  
54 Ganga River.

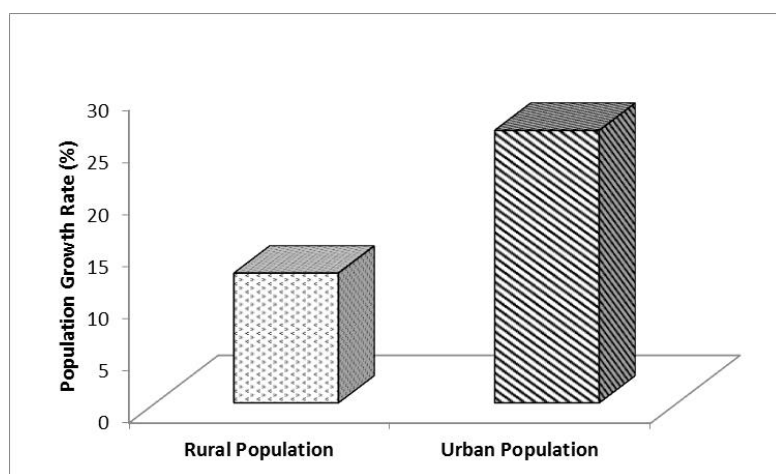

55

56 **Figure 3:** Population growth rate in rural and urban population of Upper Ganga River basin  
57 between 2001-2011

### 58 5.2 LULC changes in Upper Ganga River basin

59 The LULC maps of the UG basin for February/March 2001 and 2012 are shown in (Fig. 4a &  
60 4b). The percentage area and changes in LULC are represented in (Fig. 5a & 5b). From the  
61 results it is observed that in the UG basin the agricultural lands, built-up lands, forest, and snow  
62 and glacier increased between the periods of 2001-2012 whereas the water bodies and  
63 wastelands decreased. The highest change is observed in built-up lands LULC class that has  
64 increased by about 43.4% (Table 4). In 2001, the wastelands were about 17.1% whereas in 2012  
65 they decreased to about 11.4%. Therefore, the wastelands are the second most dynamic category  
66 with the significant decrease of about 33.6%. Agriculture land, forest and snow cover have also



67 increased by about 2.9%, 14.5% and 1.1% respectively. Conversely, Water bodies decreased  
 68 from 2.0% in 2001 to 1.8% in 2012 (Table 4). The wastelands and water bodies have mainly  
 69 converted to agricultural lands and built-up lands. Therefore, significant increase in agricultural  
 70 land class is observed in the river basin resulting in high water demand. **In the UG basin,**  
 71 **agricultural lands, forest and built-up lands increased on the expense of water bodies and**  
 72 **wastelands.** With the LULC classification the percentage change in the classes are computed and  
 73 analyzed which is represented in the (Fig. 5a & 5b). The graph illustrates the significant increase  
 74 in builtup area and forest on the cost of wastelands.

75 **Table 4.** Table showing LULC changes in the Upper Ganga River basin

| LULC Class       | Upper Ganga River basin |      |             |
|------------------|-------------------------|------|-------------|
|                  | Area (%)                |      | Changes (%) |
|                  | 2001                    | 2012 | 2001-2012   |
| Agriculture Land | 58.3                    | 60.0 | 2.9         |
| Builtup Area     | 5.3                     | 7.5  | 43.4        |
| Forest           | 13.3                    | 15.2 | 14.5        |
| Snow and Glacier | 4.0                     | 4.1  | 1.1         |
| Wastelands       | 17.1                    | 11.4 | -33.6       |
| Water Bodies     | 2.0                     | 1.8  | -10.6       |

### 84 5.3 Accuracy assessment

85 In thematic mapping from remotely sensed data, the term accuracy is used typically to express  
 86 the degree of correctness of a classified map (Foody, 2002). The confusion matrix based  
 87 accuracy assessment is a widely used approach that includes a simple cross-tabulation of the  
 88 mapped class label against that observed on the ground (or reference data) for a sample of cases  
 89 at specified locations. It is difficult to carry out accuracy assessment for all of the LULC maps



90 due to a lack of ground truth data. The satellite sensors (Landsat ETM+) and spatial resolution  
91 (30 m) of both images is same. Therefore, the most recent Landsat ETM+ of 2012 used in the  
92 study would represent the overall accuracy of other classified map (Samal and Gedam 2015).  
93 Therefore, Landsat ETM+ data of 2012 was used for accuracy assessment. A large number of  
94 ground truth samples were available for the year 2012 and a confusion matrix was prepared  
95 using corresponding LULC map. A simple random sampling of 649 pixels belonging to  
96 corresponding image objects were selected and verified against reference data at an average of  
97 108 points per each class of land use. As a rule of thumb, Congalton (1991) recommends a  
98 minimum of 50 sample points per category, which was reported by (Lillesand and Kiefer 2000)  
99 also. The results showed an overall accuracy of 90.14% and kappa index of agreement of 0.88  
100 (Table 5).

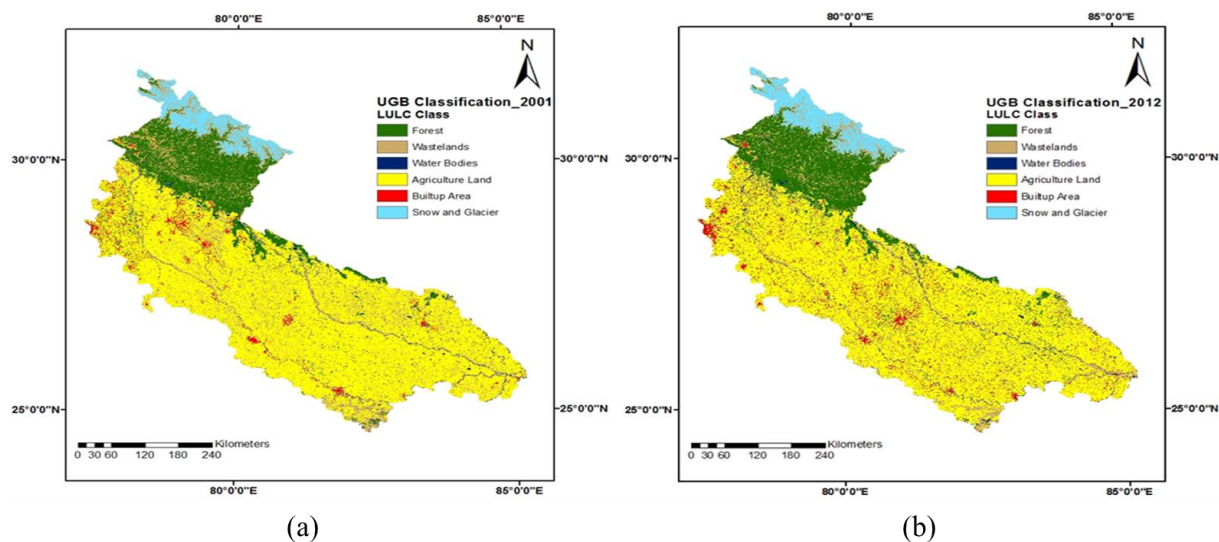

101 **Figure 4.** LULC maps of Upper Ganga River basin (a) LULC map of February/March 2001, and  
102 (b) LULC map of February/March 2012

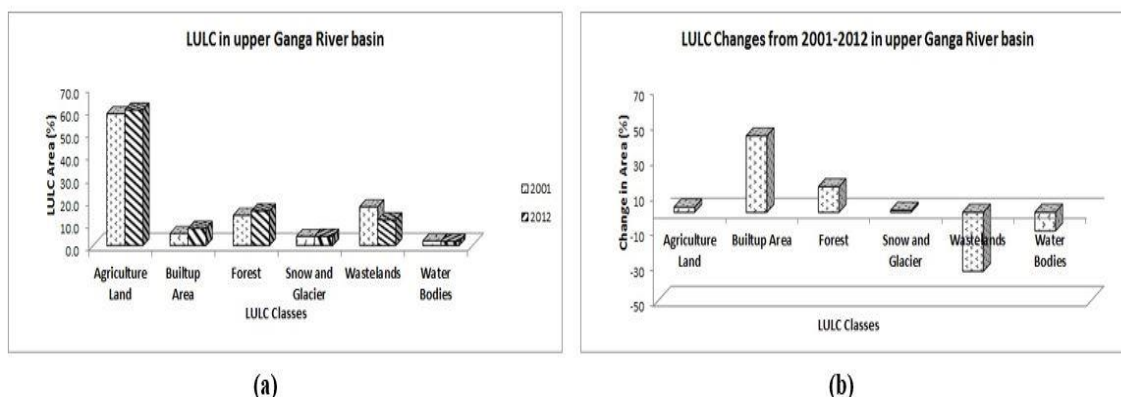

103 **Figure 5.** Graph showing LULC of the years 2001-2012 (a) LULC area in percentage (%) and  
 104 (b) LULC changes from 2001-2012 in Upper Ganga River basin

105 **Table 5.** Accuracy assessment of the 2012 LULC map produced from Landsat Enhanced  
 106 Thematic Mapper Plus (ETM+) data representing both the confusion matrix and the **Kappa**  
 107 **statistics**

| Classified Data | Reference data |     |    |     |    |    | Row Total | User's Accuracy (%) | Kappa |
|-----------------|----------------|-----|----|-----|----|----|-----------|---------------------|-------|
|                 | AG             | BU  | F  | SG  | WL | WB |           |                     |       |
| AG              | 128            | 0   | 6  | 0   | 3  | 0  | 137       | 93.43               | 0.88  |
| BU              | 2              | 96  | 2  | 5   | 1  | 0  | 106       | 90.57               |       |
| F               | 11             | 0   | 88 | 3   | 0  | 3  | 105       | 83.81               |       |
| SG              | 0              | 4   | 1  | 103 | 2  | 1  | 111       | 92.79               |       |
| WL              | 1              | 2   | 0  | 7   | 82 | 2  | 94        | 87.23               |       |
| WB              | 0              | 0   | 1  | 1   | 6  | 88 | 96        | 91.67               |       |
| Column Total    | 142            | 102 | 98 | 119 | 94 | 94 | 649       |                     |       |



|                            |       |       |       |       |       |       |  |  |  |
|----------------------------|-------|-------|-------|-------|-------|-------|--|--|--|
| <b>Producer's Accuracy</b> | 90.14 | 94.12 | 89.80 | 86.55 | 87.23 | 93.62 |  |  |  |
|----------------------------|-------|-------|-------|-------|-------|-------|--|--|--|

108

109 \*AG: Agricultural land, BU: Builtup Area, F: Forest, SG: Snow and Glacier, WL: Wastelands, WB:  
110 Water Bodies, Overall accuracy =90.14%

111 In terms of producer's accuracy, all classes were over 90%, except for three classes i.e. forest,  
112 wastelands and snow/glacier, while in terms of user's accuracy, all the classes were very close to  
113 or more than 90%. Both producer's and user's accuracy are found to be consistent for all LULC  
114 classes. A similar kind of accuracy level can be expected from past LULC maps with a very little  
115 deviation. From the accuracy assessment, it is evident that the present classification approach has  
116 been effective in producing LULC maps with good accuracy and hence can be used to study  
117 effect of urbanization induced LULC changes on river basin.

#### 118 **5.4 Effects of LULC changes on water quality of Upper Ganga River basin**

119 First statistical analysis is done on monthly water quality data of January to December of the  
120 years 2001-2012. Standard Deviation (SD) is estimated separately for each month and Mann-  
121 Kendall rank test is performed to study the existing trends (Table 6). Z values, a statistics  
122 parameter used in Mann-Kendal test (Mann 1945; Kendall 1975) are shown in Table 6.

##### 123 **5.4.1 Mann-Kendall test for water quality data**

124 In this study, Mann-Kendall rank (Mann 1945; Kendall 1975) test is used to understand the  
125 trends in the water quality parameters (2001-2012). Mann-Kendall test is a rank-based non-  
126 parametric statistical test. Being non-parametric in nature, therefore; it does not require the data  
127 to be normally distributed. In this test, the null hypothesis  $H_0$  assumes that there is no trend (data  
128 is independent and randomly ordered) and it is tested against the alternative hypothesis  $H_1$ ,  
129 which assumes that there is a trend. While computation Mann-Kendall test considers the time  
130 series of n data points and  $T_i$  and  $T_j$  as two subsets of data where  $i=1, 2, 3, \dots, n-1$  and  $j=i+1, i+2,$



131  $i+3 \dots n$ . The data values are evaluated as an ordered time series. Each data value is compared  
 132 with all subsequent data values. If a data value from a later time period is higher than a data  
 133 value from an earlier time period, the statistic  $S$  is incremented by 1. On the other hand, if the  
 134 data value from a later time period is lower than a data value sampled earlier,  $S$  is decremented  
 135 by 1. The net result of all such increments and decrements yields the final value of  $S$ .

136 The Mann-Kendall  $S$ -Statistic is computed as follows:

$$137 \quad S = \sum_{i=1}^{N-1} \sum_{j=i+1}^N \text{sgn}(x_j - x_i) \quad (3)$$

138 Where,  $N$  is number of data points. Assuming  $(x_j - x_i) = \theta$ , the value of  $\text{sgn}(\theta)$  is computed as  
 139 follows:

$$140 \quad \text{sgn}(\theta) = \begin{cases} 1 & \text{if } \theta > 1 \\ 0 & \text{if } \theta = 1 \\ -1 & \text{if } \theta < 1 \end{cases} \quad (4)$$

141 This statistics represents the number of positive differences minus the number of negative  
 142 differences for all the differences considered. For large samples ( $N > 10$ ), the test is conducted  
 143 using a normal distribution (Helsel and Hirsch 1992) with the mean and the variance as follows:

144

$$145 \quad E[S] = 0 \quad (5)$$

$$146 \quad \text{Var}(S) = \frac{N(N-1)(2N+5) - \sum_{k=1}^n t_k(t_k-1)(2t_k+5)}{18} \quad (6)$$

147 Where,  $n$  is the number of tied (zero difference between compared values) groups, and  $t_k$  is the  
 148 number of data points in the  $k$ th tied group. The standard normal deviate ( $Z$ -statistics) is then  
 149 computed as (Hirsch et al. 1982).





$$Z = \begin{cases} \frac{S-1}{\sqrt{\text{Var}(S)}} & \text{if } S > 0 \\ 0 & \text{if } S = 0 \\ \frac{S+1}{\sqrt{\text{Var}(S)}} & \text{if } S < 0 \end{cases} \quad (7)$$

150  
151 The positive value of Z test shows a rising trend and a negative value of it indicates a falling  
152 trend in the series. In this study, the significance of Z test is observed on confidence level 90%,  
153 95% and 99%. In case value of computed Z lies within the limits  $\pm 1.96$ , the null hypothesis of no  
154 trend in the series cannot be rejected at 95% level of confidence. Z is the Mann-Kendall test  
155 statistics that follows standard normal distribution with mean of zero and variance of one. Thus,  
156 in a two sided test for trend, the null hypothesis  $H_0$  is accepted if  $-Z_{1-\alpha/2} \leq Z_{mk} \leq Z_{1-\alpha/2}$  where  
157  $\alpha$  is the significance level that indicates the trend strength. Therefore, it is noted that a positive  
158 value of Z indicates an increasing trend whereas a negative value shows a decreasing trend. In  
159 this study, it is observed that the trend in each water quality parameter varies with time and  
160 location. It is a very site-specific phenomenon and therefore, no regular trends are observed.  
161 There are different point and non-point sources of pollution in the river water. Other than  
162 urbanization and industrialization, water quality parameters are highly affected by rainfall.  
163 Discharge of excess runoff water and pollutants into the rivers during rainfall events and changes  
164 in the flow patterns affect the physico-chemistry of the waterbodies. **There are three significant**  
165 **seasons identified in the study area, viz. pre-monsoon (May), monsoon (July) and post-monsoon**  
166 **(November).** Table 6 shows that water quality change is occurring in all the months over a given  
167 space and time. But the significant changes and comparatively high SD are observed in monsoon  
168 (July month) followed by pre-monsoon and post-monsoon months, respectively. As water quality  
169 varies with seasons, it is crucial to understand the effect of urbanization on water quality of  
170 different seasons. Therefore, taking into account the types of trends and SD in monthly water



171 quality parameters over time and space; and effect of different seasons on water quality from a  
172 number of reported studies (Islam et al. 2017; Sharma and Kansal 2011; Singh and Chandna  
173 2011), the water quality data is organized into three groups: pre-monsoon season (February-  
174 May), monsoon season (June-September) and post-monsoon season (October-January).  
175 Then from each group one representative month is chosen which represented the best scenario of  
176 that particular season. For e.g. SD in BOD of Kanpur station in May, July and November months  
177 are 2.01, 2.67 and 1.04 respectively. In other months, SD value of the BOD is close to the SD  
178 value of the representative months considered in that particular season. Also, from Table 6 it is  
179 evident that trends for BOD and Turbidity in July month are significant in almost all the stations  
180 against other water quality parameters. They are increasing over the years from 2001-2012.  
181 Therefore, in this study, May month for pre-monsoon season, July month for monsoon season  
182 and November month for post-monsoon season are used. It reduced the redundancy of the  
183 dataset and avoided the confusion to be created due to large insignificant dataset of varying  
184 trends that makes no sense. Significant inter seasonal changes can be observed between May,  
185 July and November months. Pre-monsoon (May) data helped to understand effect of mainly  
186 point sources of pollution from various sewage drains and industrial effluents on the water  
187 quality of rivers. In addition to point sources of pollution, monsoon (July) data took into account  
188 effect of non-point source of pollution, e.g. discharge of surface runoff from urban areas into the  
189 nearby streams during rainfall on water quality of rivers. Post-monsoon (November) data helped  
190 to understand the water quality condition of the rivers after the rainfall is over. Therefore, in this  
191 study water quality data is analyzed mainly for three months, viz. May (pre-monsoon), July  
192 (monsoon) and (post-monsoon).

#### 193 **5.4.2 Spatio-temporal variations in water quality of the Upper Ganga River basin**

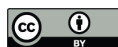

194 LULC and pollution indices are often used as important indicators to understand the effects of  
 195 anthropogenic activities on water quality. LULC changes significantly affect the water quality of  
 196 a region. Therefore, understanding of spatio-temporal relationship between LULC changes and  
 197 water quality is crucial for better planning and management of river basins. From the results, it is  
 198 observed that uncontrolled population increase in UG basin has resulted in the colossal changes  
 199 in LULC of the river basin. The changes are observed in all the six LULC classes. Built-up  
 200 lands, agricultural lands, snow cover and forest have increased in the river basin over the period  
 201 from 2001 to 2012 (Table 4). Conversely, wastelands and water bodies have diminished. OIP is  
 202 computed by considering the average of IPIs for all the seven parameters. The estimated  
 203 numerical value of the OIPs (index score) corresponded to following meaning: OIP value of 0-1  
 204 belongs to class C1 which denotes excellent water quality, 1-2 belongs to class C2 which denotes  
 205 acceptable water quality, 2-4 belongs to class C3 which denotes slightly polluted water quality,  
 206 4-8 belongs to class C4 which denotes polluted water quality, and 8-16 belongs to class C5  
 207 which denotes heavily polluted water quality. It was found that index score of IPIs increased as  
 208 the parameter value increased for BOD, total coliform, F, Turbidity, and Hardness  $\text{CaCO}_3$ .

209 **Table 6.** Trends in monthly water quality parameters from 2001 to 2012 across Upper Ganga  
 210 River basin (Z value, a Mann-Kendal statistics parameter is shown. (\*), (\*\*), (\*\*\*) and +ve  
 211 suffix indicate different significance levels)

212

| Station    | Parameter | Jan      | Feb  | Mar      | Apr | May       | Jun       | Jul      | Aug       | Sep      | Oct | Nov     | Dec  |
|------------|-----------|----------|------|----------|-----|-----------|-----------|----------|-----------|----------|-----|---------|------|
| Uttarkashi | BOD       | -2.4 (*) | 1.3  | -2.2 (*) | 0.0 | 1.2       | -0.4 (**) | 2.8      | -1.9 (+)  | -2.2 (*) | 0.0 | 1.9 (+) | 1.3  |
|            | DO%       | 1.2      | -1.5 | 0.5      | 0.0 | -3.3 (**) | -2.8 (**) | -2.2 (*) | -3.3 (**) | 1.4      | 0.0 | -2.6    | -1.5 |

(\*\*)



|           |           |           |          |           |          |           |           |           |          |          |           |          |            |
|-----------|-----------|-----------|----------|-----------|----------|-----------|-----------|-----------|----------|----------|-----------|----------|------------|
|           | F         | -1.9 (+)  | 2.0 (*)  | -3.2 (**) | 1.1      | -3.0 (**) | 0.8       | 2.0 (*)   | 2.0 (*)  | 1.1      | 1.9 (+)   | 1.1      | -3.0 (**)  |
|           | Hardness  | 1.3       | -2.5 (*) | 1.8 (+)   | -1.1     | -1.9 (+)  | -2.1 (*)  | -2.5 (*)  | -1.9 (+) | 1.2      | 1.8 (+)   | -1.1     | -2.5 (*)   |
|           | pH        | 2.7 (**)  | -1.3     | 1.2       | -0.1     | -0.2      | 0.0       | -1.5      | -1.1     | -0.2     | -1.3      | -1.3     | -1.1       |
|           | TC        | -         | -        | -         | -        | -         | -         | -         | -        | -        | -         | -        | -          |
|           | Turbidity | -         | -        | -         | -        | -         | -         | -         | -        | -        | -         | -        | -          |
|           | BOD       | -0.1      | 0.0      | 0.6       | 1.9 (+)  | 0.4       | -2.5 (*)  | 2.4 (*)   | 2.0 (*)  | 2.6 (*)  | -1.3      | 1.3      | -0.5       |
|           | DO%       | -1.3      | 1.5      | 2.3 (*)   | -2.3 (*) | 3.0 (**)  | -2.3 (*)  | 2.9 (**)  | 0.6      | 0.5      | 3.4 (***) | 3.2 (**) | -3.6 (***) |
|           | F         | -1.0      | -0.5     | 2.2 (*)   | -1.2     | 1.2       | -1.7 (+)  | 1.7 (+)   | 2.7 (**) | -0.8     | -0.6      | 0.0      | 2.5 (*)    |
| Rishikesh | Hardness  | 1.4       | -1.6     | 0.6       | 2.7 (**) | -2.3 (*)  | 0.6       | -2.4 (*)  | 1.3      | 0.0      | 3.2 (**)  | -1.6     | -2.7 (**)  |
|           | pH        | -1.6      | 0.0      | 0.0       | -0.7     | -0.9      | 0.2       | -0.2      | 1.1      | 1.9 (+)  | 1.6       | -0.8     | 0.3        |
|           | TC        | -         | -        | -         | -        | -         | -         | -         | -        | -        | -         | -        | -          |
|           | Turbidity | -         | -        | -         | -        | -         | -         | -         | -        | -        | -         | -        | -          |
|           | BOD       | 2.0 (*)   | 2.7 (**) | 2.6 (**)  | 2.3 (*)  | 3.0 (**)  | 3.4 (***) | 3.4 (***) | 2.7 (**) | 1.7 (+)  | 0.6       | 1.6      | 2.2 (*)    |
|           | DO%       | -2.7 (**) | -2.0 (*) | -0.3      | -1.1     | -0.5      | -0.3      | -2.1 (*)  | -0.5     | -0.1     | -0.8      | -1.0     | -1.8 (+)   |
| Kanpur    | F         | 1.5       | 2.0 (*)  | 1.7 (+)   | 1.6      | 1.2       | 2.1 (*)   | 2.4 (*)   | 2.2 (*)  | 2.6 (**) | 2.4 (*)   | 1.7 (+)  | 2.0 (*)    |
|           | Hardness  | 0.4       | 0.2      | 0.1       | 0.1      | 0.0       | 1.2       | 1.7 (+)   | 0.0      | 0.0      | -0.2      | -1.0     | -1.0       |



|           |           |              |         |         |             |         |          |          |          |             |              |          |          |
|-----------|-----------|--------------|---------|---------|-------------|---------|----------|----------|----------|-------------|--------------|----------|----------|
|           | pH        | 0.3          | -0.2    | 0.7     | 1.9 (+)     | 1.7 (+) | 0.2      | 1.2      | -0.9     | -0.3        | -1.0         | -0.4     | -1.2     |
|           | TC        | -            | -       | -       | -           | -       | -        | -        | -        | -           | -            | -        | -        |
|           | Turbidity | 3.5<br>(***) | 1.7 (+) | 1.7 (+) | -0.4        | -0.2    | 0.8      | 0.8      | 1.7 (+)  | -1.6        | 0.0          | 1.9 (+)  | 0.3      |
| Allahabad | BOD       | 0.8          | 0.2     | -1.3    | 0.3         | -0.1    | 0.2      | -1.0     | -0.1     | -0.5        | -0.1         | -0.4     | 0.0      |
|           | DO%       | 0.6          | -0.5    | 0.6     | 0.0         | -0.2    | 0.4      | 1.0      | 1.7 (+)  | 0.7         | 1.0          | -0.3     | -0.2     |
|           | F         | 1.6          | 1.2     | 2.0 (*) | 2.6<br>(**) | 1.6     | 1.4      | 2.2 (*)  | 2.2 (*)  | 2.7 (*)     | 1.7 (+)      | 1.6      | 1.0      |
|           | Hardness  | -0.8         | 0.0     | -1.3    | -0.3        | 0.2     | 0.1      | -0.1     | 0.3      | -0.1        | 0.4          | 0.5      | 1.5      |
|           | pH        | -1.0         | -1.3    | 0.1     | -0.3        | 0.2     | 0.1      | 1.0      | 0.1      | -1.1        | -0.4         | 0.4      | 0.0      |
|           | TC        | -1.1         | -1.0    | -1.4    | -1.0        | -1.1    | 0.6      | -0.5     | -2.0 (*) | -1.7<br>(+) | -1.4         | -1.1     | -0.3     |
|           | Turbidity | -0.9         | 0.2     | -0.6    | -0.2        | -1.4    | 0.9      | 0.4      | 0.6      | 0.4         | -0.3         | 0.0      | -1.4     |
| Varanasi  | BOD       | 2.4 (*)      | 1.5     | 1.1     | 1.4         | 2.2 (*) | 2.8 (**) | 2.7 (**) | 1.9 (+)  | 2.4 (*)     | 2.9 (**)     | 2.6 (**) | 3.0 (**) |
|           | DO%       | 1.2          | 1.4     | 2.2 (*) | 2.3 (*)     | 1.7 (+) | 0.8      | 1.5      | 2.5 (*)  | 3.2<br>(**) | 3.3<br>(***) | 2.5 (*)  | 2.5 (*)  |
|           | F         | 2.5 (*)      | 2.1 (*) | 2.4 (*) | 2.4 (*)     | 1.6     | 1.8 (+)  | 2.1 (*)  | 2.1 (*)  | 3.0<br>(**) | 2.2 (*)      | 1.2      | 2.2 (*)  |
|           | Hardness  | -0.3         | -0.3    | 0.0     | 0.1         | -0.5    | -0.7     | -0.5     | 0.1      | 0.3         | 0.8          | 0.3      | 1.9 (+)  |
|           | pH        | 0.0          | 0.0     | 1.9 (+) | 1.5         | 0.4     | 0.2      | 0.4      | 0.2      | 1.8 (+)     | 0.4          | 0.6      | 0.2      |
|           | TC        | 0.8          | 0.6     | 0.8     | 0.6         | 0.3     | -0.1     | 0.5      | 0.9      | 1.0         | 1.4          | 1.4      | 1.4      |
|           | Turbidity | -0.5         | 0.0     | 0.0     | -0.2        | -0.6    | -1.8 (+) | -0.9     | 0.9      | 0.0         | -1.4         | 0.2      | -0.2     |



214 \*\*\* trend at  $\alpha = 0.001$  level of significance; \*\* trend at  $\alpha = 0.01$  level of significance; \* trend at  
215  $\alpha = 0.05$  level of significance; + trend at  $\alpha = 0.1$  level of significance; If there is no sign after  
216 values in the table then, the significance level is greater than 0.1 (Amnell et al. 2002).

217 Increase in these parameters indicates increasing water pollution. But high DO% indicates good  
218 water health because more oxygen is available for water organisms. Hence, the index score of  
219 IPIs increased with decreasing DO%. The pH depicts the acidity or alkalinity of water. 7.0 is  
220 considered the neutral pH of a water. Acidity of water increases if pH decreases below 7.0 and  
221 alkalinity increases if it rises above 7.0. Hence, in case of pH, index score of IPIs increased if the  
222 pH increased above 8.0 or decreased below 6.0.

223 Spatio-temporal variations in the water quality of the UG basin are studied using OIPs. Water  
224 quality data of three different seasons viz. pre-monsoon (May), monsoon (July) and post-  
225 monsoon period (November) months from the year 2001-2012 are used in this study (Fig. 6 (a),  
226 (b) & (c)). Rainfall is an important driver affecting surface water quality parameters of a  
227 particular place or region. During rainfall different water quality parameters behave in different  
228 way. This phenomenon is very site specific. The post-monsoon variation of water quality at a  
229 station is highly dependent on rainfall amount, duration and intensity of a particular region.  
230 Other factors such as type of LULC, type of soils, amount and type of waste generation,  
231 treatment facilities, etc. also affect the water quality. Therefore, different trends of water quality  
232 are observed at different stations. It was observed that the water quality of the UG basin has  
233 degraded in monsoon and post-monsoon season (Fig. 6b & 6c)). Water quality parameters viz.  
234 Hardness  $\text{CaCO}_3$ , F, pH and Turbidity generally increase during post-monsoon season due to  
235 addition of various pollutants and sediments in the river water. Increase in these parameters  
236 causes water pollution. Overall quality of river water is a result of cumulative effect of changes



237 in all water quality parameters during a period. Therefore, at some places water quality may  
238 seem to improve but at other places it may seem to degrade (Fig. 7 (a), (b) & (c)). Therefore, in  
239 post-monsoon season, a regular pattern of changes in OIPs is not observed between different  
240 stations. These variations can be attributed to variations in the rainfall at different space and  
241 time. Hence, OIPs can be used as an indicator of effects of urbanization on water quality of  
242 urban area.

243 The values of Individual Parameter Indices (IPIs) and Overall Indices of Pollution (OIPs)  
244 computed at various water quality monitoring stations of Upper Ganga River basin over periods  
245 of 2001 and 2012 for pre-monsoon, monsoon and post-monsoon seasons are given in Table 7.  
246 Water quality monitoring stations of Uttarkashi and Rishikesh are located in the hilly upper  
247 reaches of the Ganga River with relatively less population and small towns. These stations are  
248 least influenced by human intervention. Therefore, all the water quality parameters at these  
249 stations are in acceptable range with no significant variations in the IPI values of the parameters  
250 over time. For example, IPI for pH in 2001 remained 2.76 in both the stations. In 2012 the pH  
251 ranged between 1.74 (post-monsoon season) to 2.09 (pre-monsoon season) at Uttarkashi station.  
252 At Rishikesh station it ranged between 2.09 (pre and post-monsoon season) to 2.52 (monsoon  
253 season) which is slightly better than the IPI values in 2001. Hence, OIP values indicate that the  
254 overall water quality of Uttarkashi and Rishikesh remain in acceptable class (C2) for all the three  
255 seasons. Therefore, in the upper reach segment of the river basin, change in the water quality of  
256 Uttarkashi and Rishikesh stations are mainly influenced from the generation of silts and climatic  
257 factor such as rainfall.

258 As the Ganga River descends down to Gangetic Plains a large number of tributaries e.g. river  
259 Yamuna that passes from metropolitan city of New Delhi and other cities joins river Ganga at

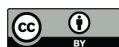

260 Allahabad. It carries a large amount of pollutant load from both municipal and industrial areas of  
261 New Delhi and other cities on its way and adds to the river Ganga. Also, a large domestic and  
262 industrial waste is discharged into the river which further escalates the pollution problem. Also,  
263 many Class I cities (population > 100000) are located all across the river basin. During rainfall,  
264 toxic urban runoff is discharged to the river directly or through storm water drains. Water  
265 pollution at Kanpur is caused by urban domestic wastes and industries mainly tanneries. At  
266 Varanasi river water is again affected due to municipal and industrial discharges into the river.  
267 Therefore, a significant degradation in the water quality of the stations located in the lower  
268 reaches of the river basin is observed from the year 2001-2012. From the temporal study of OIP  
269 across these stations, it is noticed that the water quality has deteriorated at all three stations from  
270 2001 to 2012 (Fig. 7 (a), (b) & (c)). This sharp decline in the quality of the Ganga River water is  
271 attributed to the increasing pollution from urban and industrial areas. Daily a huge amount of  
272 untreated urban wastes and industrial effluents are discharged into the river. In 2001, Allahabad  
273 is the most polluted station followed by Varanasi and Kanpur. However, in 2012, Kanpur is the  
274 most polluted station followed by Varanasi and Allahabad due to changes of LULC and  
275 population growth (Fig. 7 (a), (b) & (c)). The reason is OIP values are much higher at Kanpur,  
276 Varanasi and Allahabad than Uttarkashi and Rishikesh. Other than this most of the time the  
277 water quality at all the three stations at lower reaches remained in the acceptable to slightly  
278 polluted range.

279 **Table 7.** Individual parameter indices (IPIs) and overall indices of pollution (OIPs) computed at  
280 various water quality monitoring stations of Upper Ganga River basin over periods of 2001 and  
281 2012 for pre-monsoon, monsoon and post-monsoon seasons

282

283



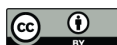

284 (i)

285

| Parameters                 | Water Quality Monitoring Stations |             |             |             |             |             |             |             |             |             |             |             |             |             |             |
|----------------------------|-----------------------------------|-------------|-------------|-------------|-------------|-------------|-------------|-------------|-------------|-------------|-------------|-------------|-------------|-------------|-------------|
|                            | Uttarkashi                        |             |             | Rishikesh   |             |             | Kanpur      |             |             | Allahabad   |             |             | Varanasi    |             |             |
|                            | May                               | Jul         | Nov         | May         | Jul         | Nov         | May         | Jul         | Nov         | May         | Jul         | Nov         | May         | Jul         | Nov         |
| BOD                        | 1.00                              | 1.00        | 1.00        | 1.00        | 1.00        | 1.00        | 1.87        | 1.00        | 1.60        | 2.67        | 2.80        | 2.47        | 1.67        | 1.47        | 1.20        |
| DO%                        | 1.33                              | 1.28        | 1.27        | 2.49        | 3.24        | 2.97        | 1.27        | 0.79        | 0.99        | 1.06        | 1.61        | 0.86        | 1.20        | 1.06        | 1.54        |
| F                          | 1.00                              | 1.00        | 1.00        | 1.00        | 1.00        | 1.00        | 1.00        | 1.00        | 1.00        | 1.00        | 1.00        | 1.00        | 1.00        | 1.00        | 1.00        |
| Hardness CaCO <sub>3</sub> | 1.00                              | 1.00        | 1.00        | 1.78        | 1.00        | 1.00        | 1.99        | 1.80        | 1.87        | 1.95        | 3.16        | 2.66        | 1.99        | 2.89        | 2.45        |
| pH                         | 2.76                              | 2.76        | 2.76        | 2.76        | 2.76        | 2.76        | 2.52        | 3.33        | 2.76        | 3.03        | 3.33        | 3.03        | 3.03        | 3.65        | 3.03        |
| Total Coliform             | -                                 | -           | -           | -           | -           | -           | -           | -           | -           | 3.43        | 4.60        | 4.98        | 4.02        | 3.48        | 3.21        |
| Turbidity                  | -                                 | -           | -           | -           | -           | -           | 1.00        | 1.00        | 1.00        | 1.00        | 1.00        | 1.00        | 1.00        | 1.00        | 1.00        |
| <b>OIP (2001)</b>          | <b>1.42</b>                       | <b>1.41</b> | <b>1.41</b> | <b>1.81</b> | <b>1.80</b> | <b>1.75</b> | <b>1.61</b> | <b>1.49</b> | <b>1.54</b> | <b>2.02</b> | <b>2.50</b> | <b>2.29</b> | <b>1.99</b> | <b>2.08</b> | <b>1.92</b> |

286

287 (ii)

288

| Parameters                 | Water Quality Monitoring Stations |             |             |             |             |             |             |             |             |             |             |             |             |             |             |
|----------------------------|-----------------------------------|-------------|-------------|-------------|-------------|-------------|-------------|-------------|-------------|-------------|-------------|-------------|-------------|-------------|-------------|
|                            | Uttarkashi                        |             |             | Rishikesh   |             |             | Kanpur      |             |             | Allahabad   |             |             | Varanasi    |             |             |
|                            | May                               | Jul         | Nov         | May         | Jul         | Nov         | May         | Jul         | Nov         | May         | Jul         | Nov         | May         | Jul         | Nov         |
| BOD                        | 1.00                              | 1.00        | 1.00        | 1.00        | 1.00        | 1.00        | 4.67        | 6.67        | 2.67        | 1.93        | 2.13        | 1.60        | 2.00        | 2.60        | 1.93        |
| DO%                        | 2.36                              | 2.97        | 2.36        | 1.81        | 2.22        | 2.08        | 1.47        | 2.22        | 1.20        | 1.54        | 1.49        | 0.65        | 1.13        | 0.65        | 0.65        |
| F                          | 1.00                              | 1.00        | 1.00        | 1.00        | 1.00        | 1.00        | 1.00        | 1.00        | 1.00        | 1.00        | 1.00        | 1.00        | 1.00        | 1.00        | 1.00        |
| Hardness CaCO <sub>3</sub> | 1.00                              | 1.00        | 1.00        | 1.00        | 1.00        | 1.00        | 2.10        | 2.02        | 1.91        | 1.97        | 1.86        | 1.92        | 1.90        | 1.00        | 1.82        |
| pH                         | 2.09                              | 1.91        | 1.74        | 2.09        | 2.52        | 2.09        | 4.81        | 3.65        | 2.76        | 3.03        | 4.00        | 3.03        | 4.81        | 3.65        | 4.81        |
| Total Coliform             | -                                 | -           | -           | -           | -           | -           | -           | -           | -           | 4.05        | 4.11        | 3.90        | 4.14        | 5.97        | 3.93        |
| Turbidity                  | -                                 | -           | -           | -           | -           | -           | 1.00        | 1.20        | 1.08        | 1.00        | 1.00        | 1.00        | 1.00        | 1.00        | 1.00        |
| <b>OIP (2012)</b>          | <b>1.49</b>                       | <b>1.58</b> | <b>1.42</b> | <b>1.38</b> | <b>1.55</b> | <b>1.44</b> | <b>2.51</b> | <b>2.79</b> | <b>1.77</b> | <b>2.07</b> | <b>2.23</b> | <b>1.87</b> | <b>2.28</b> | <b>2.27</b> | <b>2.16</b> |

289

290

291



292 (a)

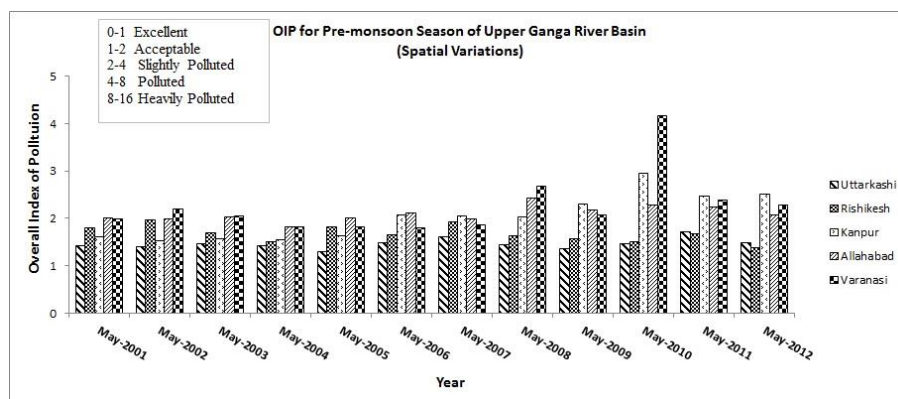

300 (b)

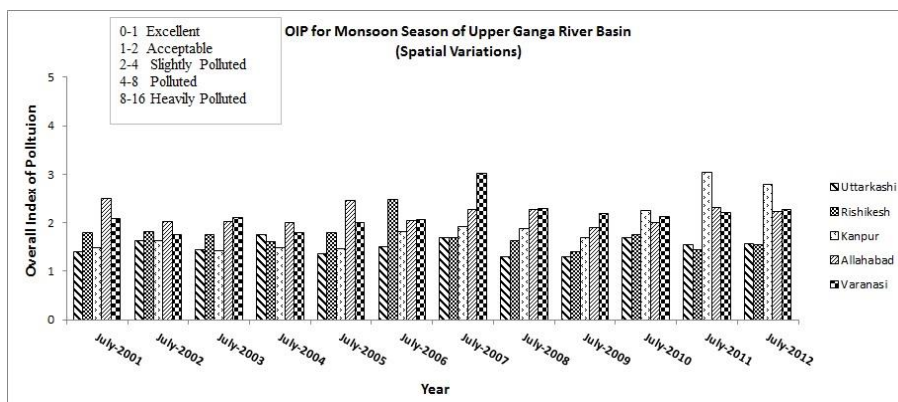

308 (c)

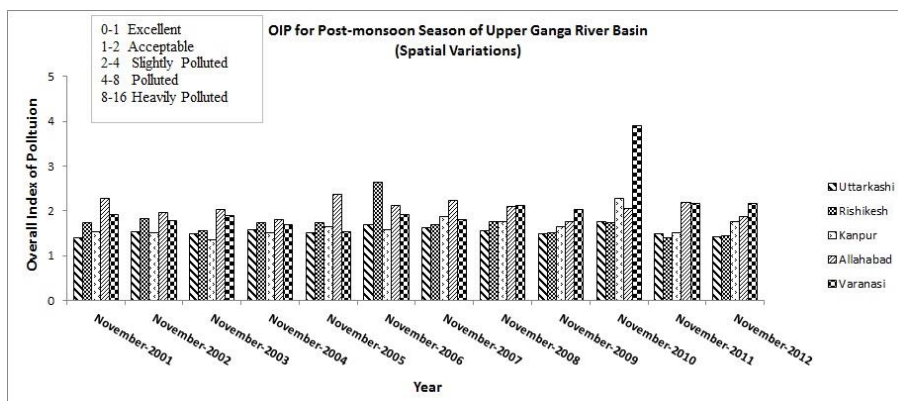



315 **Figure 6.** Spatial variations in the overall indices of pollution of upper Ganga River basin for (a)  
 316 Pre-monsoon period (b) Monsoon period, (c) Post-monsoon period

317 (a)

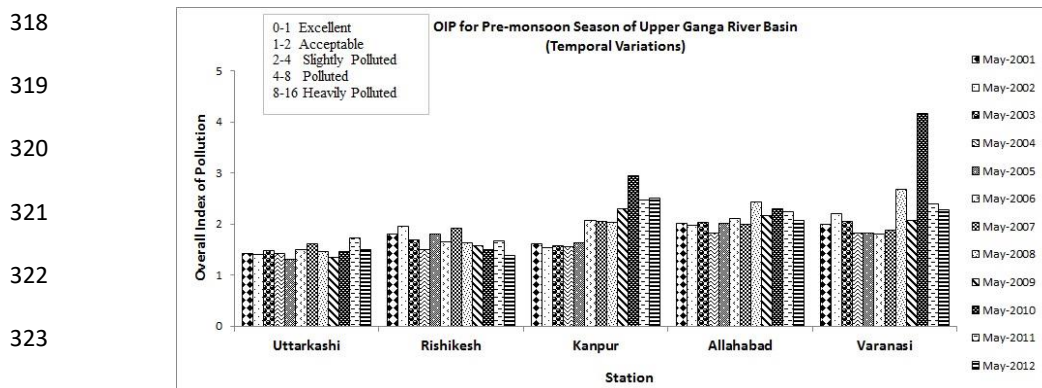

325 (b)

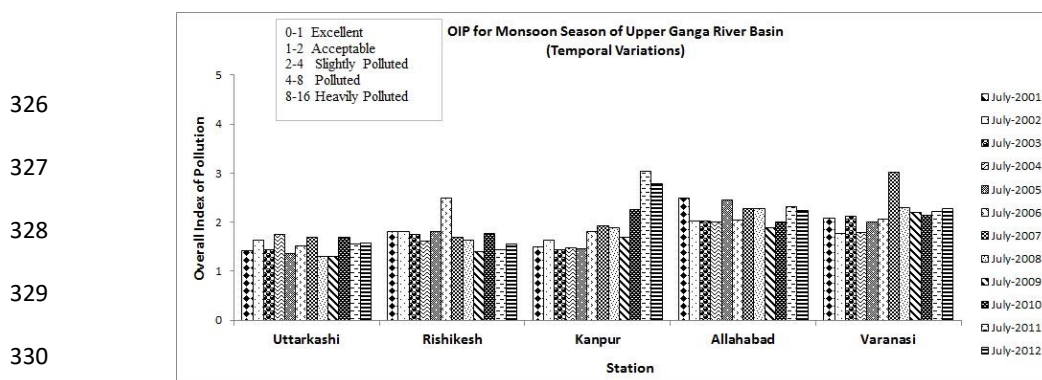

331 (c)

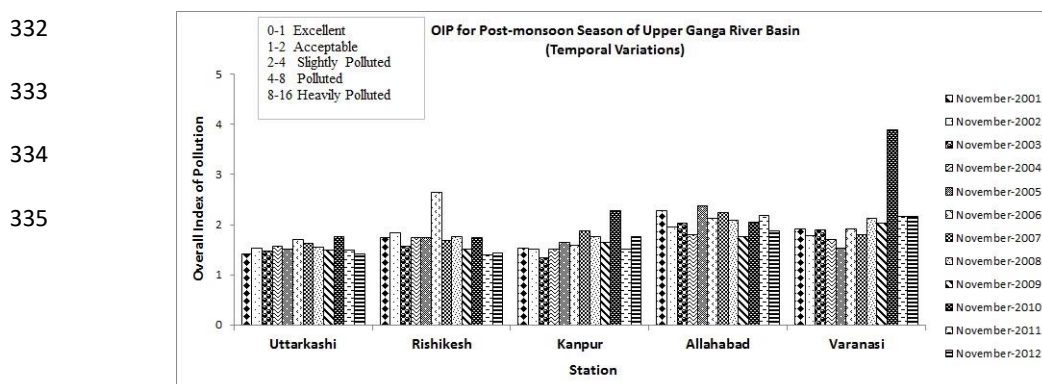



336 **Figure 7.** Temporal variations in the overall indices of pollution of upper Ganga River basin for  
337 (a) Pre-monsoon period (b) Monsoon period, (c) Post-monsoon period

338 From Table 7 it is observed that the OIP of Kanpur station changed from 1.61 to 2.51, 1.49 to  
339 1.54 and 2.79 to 1.77 in pre-monsoon, monsoon and post-monsoon seasons respectively. It is the  
340 most polluted station with most inferior water quality with maximum OIP of 2.79 (Table 7 (ii)).  
341 Similarly, OIP for Allahabad station changed from 2.02 to 2.07, 2.50 to 2.23 and 2.29 to 1.87 in  
342 three consecutive seasons whereas OIP for Varanasi changed from 1.99 to 2.28, 2.08 to 2.27 and  
343 1.92 to 2.16. Total population of all the three cities is very high and Kanpur has the highest  
344 population (6,377,452) amongst them. Varanasi has the highest population density in the region.  
345 These cities are the biggest centres of commercial activities in the river basin. All these cities are  
346 rapidly urbanizing with a number of industries mainly located near Ganga River bank. The main  
347 types of industries in Allahabad are glass, wire products, battery, etc. whereas the Varanasi  
348 consists of textile, printing, electrical machinery related industries. In the lower reaches of the  
349 Ganga River, major industrialization has occurred in and around Kanpur. Tanneries are the major  
350 types of industries in Kanpur, majority of them are located in the Jajmau area close to Ganga  
351 River. Other than tanneries, agro-based, textile, paper, mineral, metal and furniture based  
352 industries are also present. Unnao is other industrial town located close to Kanpur. Rapid  
353 urbanization and industrialization has highly affected the Ganga River water quality in this  
354 region. Large amount of municipal sewage generated in the urban areas and industrial effluents  
355 are discharged into the water. In total, 6087 MLD of wastewater is discharged into Ganga River.  
356 Out of complete river basin, six sub region namely Kanpur, Unnao, Rai-Bareilly, Allahabad,  
357 Mirazapur and Varanasi alone discharge 3019 MLD of wastewater directly/indirectly into the



358 river. Cities of Kanpur, Allahabad and Varanasi contribute about 598.19 MLD, 293.5 MLD and  
359 410.79 MLD of wastewater into the river respectively (CPCB 2013; NRSC 2014).

360 Municipal sewage water is characterized by high BOD and Total Coliform bacteria count. Table  
361 7 illustrates that a very high IPI is observed in the BOD of Kanpur (6.67), Allahabad (2.13) and  
362 Varanasi (2.60) for the year 2012. It has increased from 2001 to 2012. Similarly, in the year 2012  
363 IPI of Total Coliform bacteria count is found in the range of minimum 3.90 (Allahabad) to 5.97  
364 (Varanasi). It falls in the class of slightly polluted to polluted. DO% is a parameter which is  
365 dependent on various factors viz. elevation, temperature, atmospheric pressure, streamflow,  
366 rainfall, etc. DO% IPI is within acceptable to slightly polluted range in all the stations in 2012.

367 Flouride (F) occurs in the nature but sometimes it is introduced to the river from industries.  
368 Turbidity has changed over the years but remains mainly in the acceptable class range. In this  
369 study region, F is not changing much and is mainly within excellent class range of IPI, i.e. 1.0.

370 Industrial effluents from various industries and tanneries affect the water quality parameters, viz.  
371 BOD, Hardness  $\text{CaCO}_3$ , pH and Turbidity. The wastewater generated from various tanning  
372 operations, viz. soaking, liming, deliming and tanning, etc. result in increased levels of organic  
373 loading, salinity and specific pollutants such as sulfide and chromium. These are very toxic for  
374 pollutants (Rajeswari 2015). Hence, due to wastewater from tanneries and municipal discharges  
375 high IPI values of Hardness  $\text{CaCO}_3$  (2.10) and pH (4.81) are observed for Kanpur station in  
376 2012. Hardness  $\text{CaCO}_3$  (1.90) and pH (4.81) IPI of Varanasi is just lower to Kanpur followed by  
377 Allahabad which showed a close IPI value of 1.97 and 4.00, respectively. These cities do not  
378 have tanneries but their urban sewage and industrial effluents affect water quality of the river.

379 Between seasons, comparatively high IPI and OIP values are observed in monsoon season  
380 followed by pre-monsoon and post-monsoon season for all three stations viz. Kanpur, Varanasi



381 and Allahabad as per Table 7 (i-ii). It is due to the likely discharge of toxic urban runoff during  
382 heavy storm events. River water quality is affected due to rainfall and increased stream flow  
383 during monsoon and post-monsoon season. During rainfall, different water quality parameters  
384 behave differently. This phenomenon is very site specific. Runoff generated from the rainfall  
385 discharges pollutants from the land surface to the nearby stream, but it also improves the river  
386 water quality by dissolving and transporting some pollutants to other places through various  
387 natural processes. Hence, water quality of the stations at lower reaches of Ganga River are  
388 slightly polluted due to urbanization effects. Water quality is fairly good at stations located in the  
389 upper reaches due to less urbanization effect in these zones. Geospatial technologies along with  
390 OIP are advantageous in studying LULU changes across a large river basin. Therefore, water  
391 quality assessment using OIP could help to manage the available water resources sustainably.  
392 The future scope of this study comprises the understanding of hydrologic and ecological  
393 response of the water quality changes across the river basin.

## 394 **6. Conclusions**

395 A comprehensive study is done to understand the effects of demographic changes and land  
396 transformations on seasonal surface water quality of the Upper Ganga River basin. Total  
397 population near to monitoring stations has been increased in the basin from 2001 to 2011. From  
398 the results, it is evident that total population has increased in the UG basin. In the urban areas  
399 PGR is about 26.16% which is higher than PGR of rural areas which is 12.45%. Population of  
400 the cities located along the river Ganga i.e. Kanpur, Varanasi and Allahabad also increased. This  
401 basin has experienced rapid urbanization and industrialization in the past few decades. Due to  
402 population changes, characteristic LULC changes are observed in the UG basin. Between the  
403 years, 2001-2012, in the UG basin highest increase of about 2.9% was observed in LULC class



404 of agricultural lands. Built-up lands, snow cover and forest were increased by 43.4%, 1.1% and  
405 14.5% respectively. Conversely, decrease of 33.6% and 10.6% were observed in wastelands and  
406 water bodies classes respectively. Due to increase in food demands of growing population,  
407 agricultural lands also increased in the river basin. New waterbodies were constructed to fulfill  
408 mainly the irrigation requirements of the basin. Builtup-lands also increased all over the river  
409 basin due to increase in urban population in urban cities/towns and in industrial areas.  
410 Agricultural lands, and built-up lands increased on the expense of wastelands. New waterbodies  
411 were constructed in this basin to mainly fulfill the domestic and industrial water demands of the  
412 growing urban population. Water quality degradation has occurred in the basin consequently  
413 affecting the health status of the river. From Table 6, it can be inferred that BOD and turbidity  
414 show consistently an increasing trend for most of the months of a year and this certainly  
415 indicates the severity of pollution in the industry dominated urban city of Kanpur.

416 OIP estimates across the river basin demonstrate that the water quality of Uttarkashi and  
417 Rishikesh remained in acceptable class for all the three seasons. These observation stations are  
418 surrounded by hills and due to less population, they are not much influenced by human  
419 intervention. Therefore, in the upper reach segment of the river basin, change in the water quality  
420 of Uttarkashi and Rishikesh stations is mainly influenced from the generation of silts and  
421 climatic factor such as rainfall. A significant degradation in the water quality of the stations  
422 located in the lower reaches of the river basin is observed from the year 2001-2012. This sharp  
423 decline in the quality of the Ganga river water is attributed to the increasing total population and  
424 LULC changes. In 2001, Allahabad is the most polluted station followed by Varanasi and  
425 Kanpur. However, in 2012, Kanpur is the most polluted station followed by Varanasi and  
426 Allahabad due to changes of LULC and population growth. Other than this most of the time, the



427 water quality at all the three stations remained in the slightly polluted range. From the spatial and  
428 temporal study of OIP across these stations, it is noticed that the water quality has deteriorated at  
429 all three stations from 2001 to 2012.

430 OIP is a promising tool to study the effect of demographic changes and LULU transformations  
431 on the spatio-temporal variations in the water quality across a river basin. Geospatial  
432 technologies are advantageous in studying LULU changes over a large river basin. Therefore,  
433 water quality assessment using OIP tool could help to assess and solve local and regional water  
434 quality related problems over a river basin. This could help the policy makers and planners to  
435 understand the status of water pollution so that suitable strategies could be made for sustainable  
436 development in a river basin.

#### 437 **Acknowledgements**

438 The authors are thankful to Civil Engineering Department, Indian Institute of Technology  
439 Roorkee, Uttarakhand, India for all its support. We would like to express our gratitude to the  
440 Census Department (Government of India) and Central Water Commission (CWC), New Delhi  
441 for providing census and water quality datasets respectively.

#### 442 **References**

- 443 Abbasi, T., and Abbasi, S. A. (2012). "Water quality indices." Elsevier.
- 444 Amnell, T., Anttila, P., Maatta, A. R. A., and Salmi, T. (2002). "Detecting Trends of Annual  
445 Values of Atmospheric Pollutants by the Mann-Kendall Test and Sen's Slope Estimates."  
446 Helsinki: Finnish Meteorological Institute, 31.
- 447 Ballester, M. V. R., de C Victoria, D., Krusche, A. V., Coburn, R., Victoria, R. L., Richey, J. E.,  
448 Logsdon, M. G., Mayorga, E., and Matricardi, E. (2003). "A remote sensing/GIS-based physical





449 template to understand the biogeochemistry of the Ji-Parana river basin (Western Amazonia).”  
450 *Remote Sensing of Environment*, 87(4), 429-445.

451 Ban, X., Wu, Q., Pan, B., Du, Y., and Feng, Q. (2014). “Application of Composite Water Quality  
452 Identification Index on the water quality evaluation in spatial and temporal variations: a case  
453 study in Honghu Lake, China.” *Environmental Monitoring and Assessment*, 186(7), 4237-4247.

454 Bharati, L., and P. Jayakody. (2010). “Hydrology of the Upper Ganga River.” International  
455 Water-Management Institute. Project Report No: H043412.  
456 <http://publications.iwmi.org/pdf/H043412.pdf>.

457 Bhuvan Portal, Indian Space Research Organization (ISRO), Government of India. (2016).  
458 Available online at: <http://bhuvan.nrsc.gov.in/>. Accessed on: August 17, 2015.

459 Bjorklund, G., Connor, R., Goujon, A., Hellmuth, M., Moriarty, P., Rast, W., Warner K., and  
460 Winpenny J. (2011). “Demographic, economic and social drivers: Chapter 2. World water  
461 development report 3.” United Nations Educational, Scientific and Cultural Organization  
462 (UNESCO). [http://webworld.unesco.org/water/wwap/wwdr/wwdr3/pdf/12\\_WWDR3\\_ch\\_2.pdf](http://webworld.unesco.org/water/wwap/wwdr/wwdr3/pdf/12_WWDR3_ch_2.pdf).  
463 Accessed 05 August 2015.

464 Central Pollution Control Board (CPCB), Ministry of Environment and Forests, Govt. of India.  
465 (2013). “Report on Pollution Assessment: River Ganga.” Available online at: [www.cpcb.nic.in](http://www.cpcb.nic.in).  
466 Accessed on: September 15, 2016.

467 Chalmers, A. T., Van Metre, P. C., and Callender, E. (2007). “The chemical response of particle-  
468 associated contaminants in aquatic sediments to urbanization in New England, USA.” *Journal of*  
469 *Contaminant Hydrology*, 91(1), 4-25.

470 Congalton, R. G. (1991). “A review of assessing the accuracy of classifications of remotely  
471 sensed data”. *Remote sensing of environment*, 37(1), 35-46.



- 472 Farzadkia, M., Djahed, B., Shahsavani, E., and Poureshg, Y. (2015). “Spatio-temporal evaluation  
473 of Yamchi Dam basin water quality using Canadian water quality index.” *Environmental*  
474 *Monitoring and Assessment*, 187(4), 1-15.
- 475 Foody, G. M. (2002). “Status of land cover classification accuracy assessment”. *Remote sensing*  
476 *of environment*, 80(1), 185-201.
- 477 Gowd, S. S., Reddy, M. R., and Govil, P. K. (2010). “Assessment of heavy metal contamination  
478 in soils at Jajmau (Kanpur) and Unnao industrial areas of the Ganga Plain, Uttar Pradesh, India.”  
479 *Journal of Hazardous Materials*, 174(1), 113-121.
- 480 Halder, S., Mandal, S. K., Thorat, R. B., Goel, S., Baxi, K. D., Parmer, N. P., Patel, V., Basha,  
481 S., and Mody, K. H. (2014). “Water pollution of Sabarmati River a Harbinger to potential  
482 disaster.” *Environmental Monitoring and Assessment*, 186(4), 2231-2242.
- 483 Helsel, D. R., and Hirsch, R. M. (1992). “Statistical methods in water resources.” (Vol. 49).  
484 Elsevier.
- 485 Hirsch, R. M., Slack, J. R., and Smith, R. A. (1982). “Techniques of trend analysis for monthly  
486 water quality data.” *Water resources research*, 18(1), 107-121.
- 487 Hoseinzadeh, E., Khorsandi, H., Wei, C., and Alipour, M. (2014). “Evaluation of Aydughmush  
488 River water quality using the National Sanitation Foundation Water Quality Index (NSFWQI),  
489 River Pollution Index (RPI), and Forestry Water Quality Index (FWQI).” *Desalination and*  
490 *Water Treatment*, 54, 2994–3002.
- 491 Islam, M. M., Lenz, O. K., Azad, A. K., Ara, M. H., Rahman, M., and Hassan, N. (2017).  
492 “Assessment of Spatio-Temporal Variations in Water Quality of Shailmari River, Khulna  
493 (Bangladesh) Using Multivariate Statistical Techniques.” *Journal of Geoscience and*  
494 *Environment Protection*,” 5 (01), 1.



- 495 Kendall, M. G. (1975). “Rank correlation methods.”, 4th ed. Charles Griffin, London, p. 202.
- 496 Kindu, M., Schneider, T., Teketay, D., and Knoke, T. (2015). “Drivers of land use/land cover  
497 changes in Munessa-Shashemene landscape of the south-central highlands of Ethiopia.”  
498 *Environmental Monitoring and Assessment*, 187(7), 1-17.
- 499 Kocer, M. A. T., and Sevgili, H. (2014). “Parameters selection for water quality index in the  
500 assessment of the environmental impacts of land-based trout farms.” *Ecological Indicators*, 36,  
501 672-681.
- 502 Kumar, T., and Jhariya, D. C. (2015). “Land quality index assessment for agricultural purpose  
503 using multi-criteria decision analysis (MCDA).” *Geocarto International*, 30(7), 822–841.
- 504 Li, J., Meng, X., Zhang, Y., Li, J., Xia, L., and Zheng, H. (2015). “Analysis of the temporal and  
505 spatial distribution of water quality in China’s major river basins, and trends between 2005 and  
506 2010.” *Frontiers of Earth Science*, 9(3), 463-472.
- 507 Lillesand, T. M., and Kiefer, R. W. (2000). “Remote Sensing and Image Interpretation”. Fourth  
508 Ed., John Wiley & sons, Inc. 7, 2000, pp. 470-615.
- 509 Liu, J., Liu, Q., and Yang, H. (2016). “Assessing water scarcity by simultaneously considering  
510 environmental flow requirements, water quantity, and water quality.” *Ecological Indicators*, 60,  
511 434-441.
- 512 Mann, H. B. (1945). “Nonparametric tests against trend.” *Econometrica: Journal of the*  
513 *Econometric Society*, 245-259.
- 514 Milovanovic, M. (2007). “Water quality assessment and determination of pollution sources along  
515 the Axios/Vardar River, Southeastern Europe.” *Desalination*, 213(1), 159-173.
- 516 Census of India, Office of the Registrar General, Census of India. (2011). “Census-2011.”  
517 Available online at: <http://www.censusindia.gov.in>. Accessed on: June 01, 2015.



518 National Remote Sensing Centre (NRSC), Water Resources Information System (WRIS) Report,  
519 Indian Space Research Organisation (ISRO), Government of India. (2014). “Report on Ganga  
520 Basin: Version 2.0”. Available online at: [http://www.india-](http://www.india-wris.nrsc.gov.in/Publications/BasinReports/Ganga%20Basin.pdf)  
521 [wris.nrsc.gov.in/Publications/BasinReports/Ganga%20Basin.pdf](http://www.india-wris.nrsc.gov.in/Publications/BasinReports/Ganga%20Basin.pdf). Accessed on: August 26, 2017.  
522 Phung, D., Huang, C., Rutherford, S., Dwirahmadi, F., Chu, C., Wang, X., Nguyen, M., Nguyen,  
523 N. H., Do, C. M., Nguyen, T. H., and Dinh, T. A. D. (2015). “Temporal and spatial assessment  
524 of river surface water quality using multivariate statistical techniques: a study in Can Tho City, a  
525 Mekong Delta area, Vietnam.” *Environmental Monitoring and Assessment*, 187(5), 1-13.  
526 Prati, L., Pavanello, R., and Pesarin, F. (1971). “Assessment of surface water quality by a single  
527 index of pollution.” *Water Research*, 5(9), 741-751.  
528 Rai, P. K., Mishra, A., and Tripathi, B. D. (2010). “Heavy metal and microbial pollution of the  
529 River Ganga: A case study of water quality at Varanasi.” *Aquatic Ecosystem Health &*  
530 *Management*, 13(4), 352-361.  
531 Rai, R. K., Upadhyay, A., Ojha, C. S. P., and Singh, V. P. (2011). “The Yamuna river basin:  
532 water resources and environment.” Springer Science & Business Media, 66.  
533 Rajeswari, A. (2015). “Efficiency of effluent treatment plant and assessment of water quality  
534 parameters in tannery wastes.” *European Journal of Experimental Biology*, 5(8), 49-55.  
535 Rangeti, I., Dzwairo, B., Barratt, G. J., and Otieno, F. A. O. (2015). “Ecosystem-specific water  
536 quality indices.” *African Journal of Aquatic Science*, 40(3), 227-234.  
537 Rashid, I., and Romshoo, S. A. (2013). “Impact of anthropogenic activities on water quality of  
538 Lidder River in Kashmir Himalayas.” *Environmental Monitoring and Assessment*, 185(6), 4705-  
539 4719.

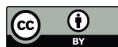

- 540 Russell, I. A. (2015). “Spatio-temporal variability of five surface water quality parameters in the  
541 Swartvlei estuarine lake system, South Africa.” *African Journal of Aquatic Science*, 40(2), 119-  
542 131.
- 543 Sanchez, E., Colmenarejo, M. F., Vicente, J., Rubio, A., García, M. G., Travieso, L., and Borja,  
544 R. (2007). “Use of the water quality index and dissolved oxygen deficit as simple indicators of  
545 watersheds pollution.” *Ecological Indicators*, 7(2), 315-328.
- 546 Samal, D. R., and Gedam, S. S. (2015). “Monitoring land use changes associated with  
547 urbanization: An object based image analysis approach.” *European Journal of Remote Sensing*,  
548 48(1), 85-99.
- 549 Sargaonkar, A., and Deshpande, V. (2003). “Development of an overall index of pollution for  
550 surface water based on a general classification scheme in Indian context.” *Environmental*  
551 *Monitoring and Assessment*, 89(1), 43-67.
- 552 Sharma, D., and Kansal, A. (2011). “Water quality analysis of River Yamuna using water quality  
553 index in the national capital territory, India (2000–2009).” *Applied Water Science*, 1(3-4), 147-  
554 157.
- 555 Sharma, P., Meher, P. K., Kumar, A., Gautam, Y. P., and Mishra, K. P. (2014). “Changes in  
556 water quality index of Ganges river at different locations in Allahabad.” *Sustainability of Water*  
557 *Quality and Ecology*,” 3, 67-76.
- 558 Singh, R. B., and Chandna, V. (2011). “Spatial analysis of Yamuna River water quality in pre-  
559 and post-monsoon periods.” IAHS-AISH publication, 8-13.
- 560 Smith, V. H., Tilman, G. D., and Nekola, J. C. (1999). “Eutrophication: impacts of excess  
561 nutrient inputs on freshwater, marine, and terrestrial ecosystems.” *Environmental Pollution*,  
562 100(1), 179-196.



- 563 Teodosiu, C., Robu, B., Cojocariu, C., and Barjoveanu, G. (2013). “Environmental impact and  
564 risk quantification based on selected water quality indicators.” *Natural Hazards*, 75(1), 89-105.
- 565 Tsihrintzis, V. A., and Hamid, R. (1997). “Modeling and management of urban stormwater  
566 runoff quality: a review.” *Water Resources Management*, 11(2), 136-164.
- 567 Tu, J. (2011). “Spatially varying relationships between land use and water quality across an  
568 urbanization gradient explored by geographically weighted regression.” *Applied Geography*,  
569 31(1), 376-392.
- 570 United States Geological Survey (USGS), United States of America. (2016). Available online at:  
571 <http://www.usgs.gov/>. Accessed on: September 25, 2015.
- 572 Wilson, C. O. (2015). “Land use/land cover water quality nexus: quantifying anthropogenic  
573 influences on surface water quality.” *Environmental Monitoring and Assessment*, 187(7), 1-23.
- 574 Yang, F., Xu, Z., Zhu, Y., He, C., Wu, G., Qiu, J. R., Fu, Q., and Liu, Q. (2013). “Evaluation of  
575 agricultural nonpoint source pollution potential risk over China with a Transformed-Agricultural  
576 Nonpoint Pollution Potential Index method.” *Environmental Technology*, 34(21), 2951-2963.
- 577 Yu, S., Xu, Z., Wu, W., and Zuo, D. (2016). “Effect of land use types on stream water quality  
578 under seasonal variation and topographic characteristics in the Wei River basin, China.”  
579 *Ecological Indicators*, 60, 202-212.
